# Supplementary material for: Vesicular Stomatitis Virus Elicits Early Transcriptome Response in Culicoides sonorensis Cells
Source: MDPI journal article supplement (doi:10.3390/v15102108), 2023-10-18
Supplement: s1 [file s1]

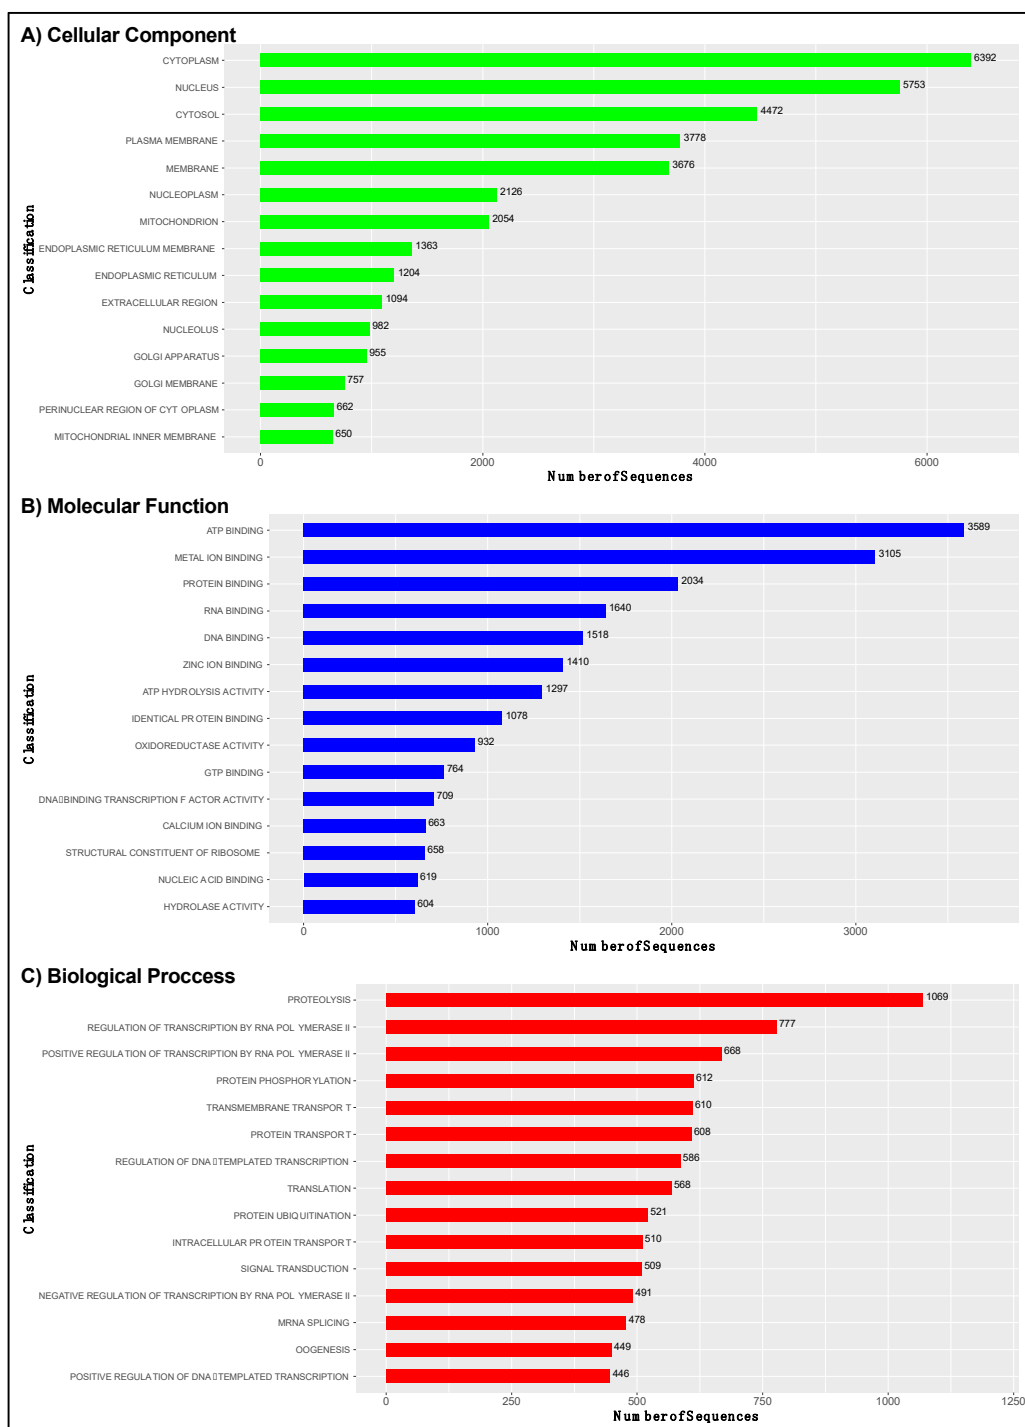

Figure S2. Gene ontology annotations from entire W8 transcriptome A) cellular components, B) Molecular function, C) Biological processes.
