# Supplementary material for: Vesicular Stomatitis Virus Elicits Early Transcriptome Response in Culicoides sonorensis Cells
Source: MDPI journal article supplement (doi:10.3390/v15102108), 2023-10-18
Supplement: s1 [file s1]

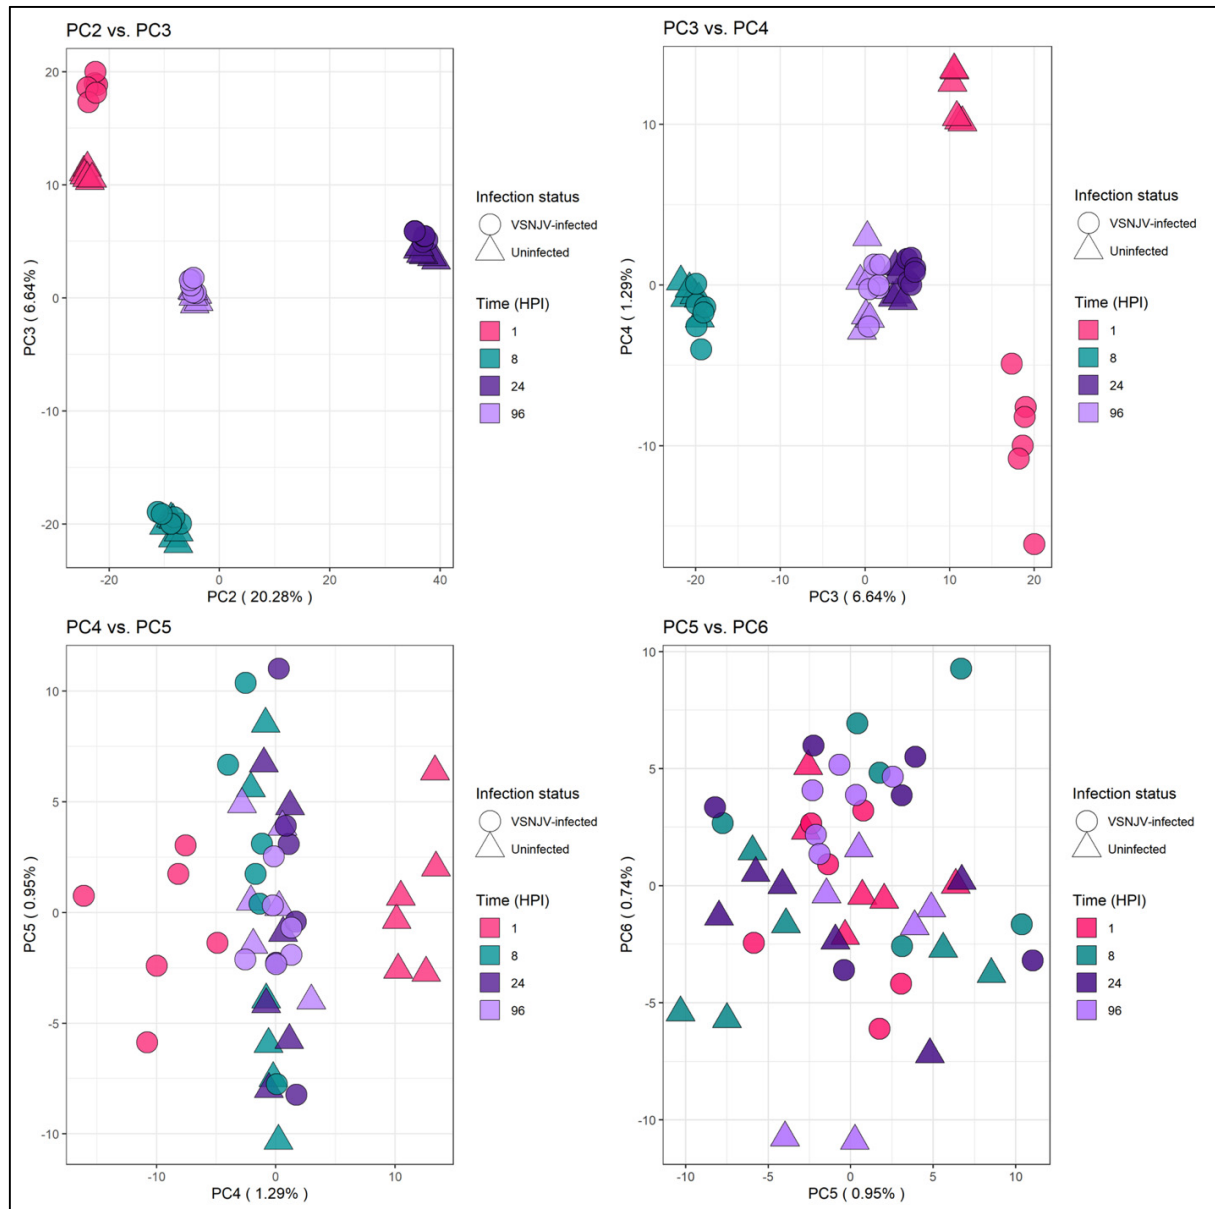

Figure S3. Principal component analyses for transcriptomes from VSNJV-infected and mock infected W8 cells at 4 time points post-infection. See Figure 2 for PC1 vs PC2 and PC1 vs PC3.
