# Supplementary material for: Vesicular Stomatitis Virus Elicits Early Transcriptome Response in Culicoides sonorensis Cells
Source: Viruses. 2023 Oct 18;15(10):2108. doi: 10.3390/v15102108 (PMC10612082; doi:10.3390/v15102108)
Supplement: Supplementary file 1 [file viruses-15-02108-s001.zip]

Archive with 6 entries (6 files):
- Supplemental Figure S1.pdf
- Supplemental Figure S2.pdf
- Supplemental Figure S3.pdf
- Supplemental Table S1.xlsx
- Supplemental Table S2.xlsx
- Supplemental Table S3.xlsx
