# Supplementary material for: Vesicular Stomatitis Virus Elicits Early Transcriptome Response in Culicoides sonorensis Cells
Source: Viruses. 2023 Oct 18;15(10):2108. doi: 10.3390/v15102108 (PMC10612082; doi:10.3390/v15102108)
Supplement: Supplementary file 1 [file viruses-15-02108-s001.zip › Supplemental Table S1.xlsx]

## Sheet: Sheet1
gene	gene	pub_name1	pub_name2	trancript_name	trembl_id	baseMean	log2FoldChange	Fold Change	lfcSE	stat	pvalue	padj	Identified with Swisspro	sequence
REG5_DROME	REG5_DROME	REG5_1	REG5_DROME_1	TRINITY_DN4418_c0_g1_i20	A0A084W0W9|Rhythmically^A0A084W0W9|Rhythmically^Q:342-1223,H:9-338^44.3%ID^E:1e-61^.^.	234.594	-2.40734	-5.30495	0.10422	-17.5334	7.97e-69	4.72e-65	Yes	ACCAAACATACTCATTTGTTGTTGAAACATCACGAAGTAAAGATCGCTTAAATTTAAAAATAAATTCAAAAATAATAAAAATAAAAGTGAGAAAATAATTATTAACATAAAATAAAAAATACACACATTAGTGAATTAAAAAGAAAGATTATTATCATTAAATTTATTTTATATGAAACAATAATTTAAAATAAATAAAAAAAATTTAATAAACTTGAATAAAATTACATATAAAAAAGTGCATAAGTGACATTTTAAATATAATAAAATTACAACAATAATACGGAAATAAAAATAACATACAAACAGTTAAAATAATGGCAAAACATAGCTTAAAAATGTTTATTAGTGCAGTAATTGTGCTTTTATCAATTGTTCATGAGTCAACCGGCTCAGCGA…
Unidentified	Unidentified	Unidentified_18	Unidentified_18	TRINITY_DN3566_c1_g1_i2	A0A069DQ40|Conserved^A0A069DQ40|Conserved^Q:771-1250,H:30-193^40%ID^E:1.9e-30^.^.	50.7142	-2.37977	-5.20455	0.189256	-9.50971	1.91e-21	2.27e-18	No	GCATTACATGAAGCAGTGAATTCAATTCCAGCATATTGAAATGCGATTTTGTCGCGAGCGCATGCTACAATTAAGAACTTTGCTGATTATTATAACTTGTGCTACATTACACAACGAGTACGAACAGGAATAAAAAAATAAGAATTATATGCCTTACTGACATCTAATTGAGTGTAAACTGGTACCAAAAAAAAGATAAATTTTCTGGGACAATGATCGTACAATGTAAAAATGTGAAAAATCATATTATAATAATACAAACTTTTATTTTTTTCTTGATTTTCACATGAAATATTAACTGTTCCGAGTCCAAAGACAGTGATCTTAGAAAAAAAAATAAACAAATATAGTTTAGATTACATTTGGTGATAAAATTCTCCATAAAAAAAGTTTATAAGA…
SMAD6_MOUSE	SMAD6_MOUSE	SMAD6_1	SMAD6_MOUSE	TRINITY_DN421_c5_g1_i3	A0A067QH14|Mothers^A0A067QH14|Mothers^Q:262-1194,H:6-308^46%ID^E:7.8e-74^.^.	1559.96	-2.26535	-4.80772	0.0479835	-35.1236	2.94e-270	5.23e-266	Yes	CAGAACAAACGAAAGAGTCTTTCGAAAAGACTATGGCGGGCAAGATTGTCCTCCACAGTCAACAATTTCCAACAGCAACAACAACAACAACAATCTGCAATGGATACAGATGCATATCCAAATACCGGTATCGACGGAGGCGGACGAAATGTCTTTCGGGATTGTTGTGTCAGCAACAATTCGCAACGCAATGCCGCATCGGCAATCTCATCACGGAACATACCACCGGAAGACGTTACGCGATACCAAATGTTTCTAGAACTGATTGGCAACTTGAAAGAAAAGCAATTGGAAACATTGTACACGGCAATTACCATGGAATTGGGTTGCAACGACGACCTAACATCTGTCAAGTCAGATTGTGTCCTTGTCAAGAAGGGATTCCAGACTGCAGAAGCG…
Unidentified	Unidentified	Unidentified_24	Unidentified_24	TRINITY_DN4216_c3_g1_i1	.	498.939	-2.23247	-4.69938	0.0670839	-24.6329	5.62e-134	4.99e-130	No	AATTCATCGCGTTAACTTGTCGTATCGTAAAATCACTGATAATTCTTTTATATTATTTTTTTTGTCATAAAATTAAGTTTTTAATACAAAAATTCACATATTTTTTATAATCAAAATAAAAATTAAGCATTAACGTGAATTACATATCAAAAATACCATTGTTTAACAACGATATCAAGAGGAAATATTGAATAAGTTTAAAAAATATCGAAAGCAATTAAATTTTTTATATAGAAAAATTAAAGAAAAAAAAATCAAAATAGTACATTTAATATAAAAGTGCTAGATATGCTAAAAATATTGTAATAAATAATAATACATTTCACATATCACCATATAAATATATAAAGTGAGCGAGTGCTATAAATGAATTTAATATTCATATAAAATAATAAAAAA…
Unidentified	Unidentified	Unidentified_3	Unidentified_3	TRINITY_DN1165_c1_g2_i1	.	18.4798	-1.96038	-3.89166	0.336627	-4.10064	4.12e-05	0.00882544	No	AAAAAAATATATTATTATTATTATTATTGAAAATTATACACAATTGAAAATTTTAGAATGAAAAAGAATTGACATTTAGATGTAAATGTAGAGCGTACAGTAGAAAAAAAAACAATATAAAAAATTAGAATTAATAGAGAATAGAGTTTACAAGACTTAAAAATTACATAATAATAAAATGAACAATTCCATTAAAATATAAGCAAGAGTAGAGCGGTTTCCAAGATATCAAATCAATCATAAATAATGCGAGTAATAAAAATAACTTTAAAAATTCAAAATAAAAATATATATTAAATAAATCATTAAAAATATAAAAGTAGAAACAAAAATAATCAAAAGATATACCAATAAAATAATGTTGTGGTAGATAAAAGGAGCTTTTCATCAATGAACTGT…
DSX_DROME	DSX_DROME	DSX_1	DSX_DROME_1	TRINITY_DN9925_c0_g1_i12	A0A076YFA7|DM^A0A076YFA7|DM^Q:994-1773,H:2-314^40.6%ID^E:6.7e-49^.^.	39.2334	-1.77159	-3.41429	0.18421	-6.46864	9.89e-11	4.88e-08	Yes	CAAAAAAAGAAAATTCTTGAAGGAATAAATTTAAAGATTGCGATATACTGATTAAAATTATTTTCTTTTTCAGAAAATAATGAAAGTCGTTTGTCGAAAAAATCCAGAAAAGACAAAAAGTGGTGGGCATTCGCGAGGCTCATTTAAAAAGGCATTCTCCAAGAAATGTTTCGCTTAAAAATGTTTTAGCTTAAGAATAAGTTTTTAGCTACTAGGATTTTGATGTGAGATAGGGGACTAATAATCAAGTTTAATCTTGATTATAAGTCTCAGAAATGCTAACCATAACTATTTTGATCTTCGGCTTGTGGCGGATGGGCCATGTGGGCAATTTGGCAATTCCCAGAAAGGCCGCAGTCGATTTTCTTGTAAAAGTAAAGTTTAGCGTAAATTTTAAAG…
CUD2_SCHGR	CUD2_SCHGR	CUD2_1	CUD2_SCHGR_1	TRINITY_DN4903_c0_g1_i20	A0A034VDR9|Endocuticle^A0A034VDR9|Endocuticle^Q:2021-1788,H:59-131^74.4%ID^E:6.5e-26^.^.	649.198	-1.54647	-2.92102	0.0636285	-15.1893	4.16e-52	1.23e-48	Yes	AATTAAAACTAAACACTATCATTTTTTCTCTTAAATACAAAATTAAAACTAAACACTATCATTAAAAATCACTCCATTTTGTTTAAATTCATTTTTCAATTCCTCATATCTCTCTTTGGTTATTTTATTATTTTTCAATGCAATTTCCTTCAAATTCGGAAACTGATTATCAATTTTTTTAGCATCCACATCACTTAACTGATTTCCATCTAAATATAATTTTGTGAGAAATTTATTTTTATGCCATTTTTCAGTCAAACTGAATTCGGTCAGAGAATTATTTGATAAACGAATTTCTGTTAATTTACTGCAATTATTGAATGCGCCTTCCATTATTTGGTGTAAATTTAAATTTTTGGCCTCAATTTCTTCTAGATTAGGGAATGTGTTACAAATGTC…
Unidentified	Unidentified	Unidentified_26	Unidentified_26	TRINITY_DN51807_c0_g1_i1	.	78.6868	-1.4509	-2.73378	0.235488	-3.69827	0.000217078	0.0389841	No	ATACGTCTTACCATACGGATAGAGTGTTGAGTTCAATTGTAGTATTAAAAAATGCCTTGTACAGTATTTAGAAGGAAATGAACCATGAGTTCTCACAAATTAAAGCTCAATTAGATCGTATTGAGCTTCACTTGGATAATTCTGCTTTTTTGATCAAATGGTGGGGAACAAAAATTGACTTTGATCAAAAAATTGAAACTGTTTATCGTGATATAAGTCGAAATCTGTCAATATACGTATTAGAACTCATTGCTTCTGTGGGTTTTTGTGGTTGATCTG
MOX12_DROME	MOX12_DROME	MOX12_1	MOX12_DROME_1	TRINITY_DN1165_c1_g1_i1	A0A084WGT0|DOMON^A0A084WGT0|DOMON^Q:390-2303,H:33-655^56%ID^E:1.4e-219^.^.	85.2859	-1.43487	-2.70357	0.154405	-5.53652	3.09e-08	1.19e-05	Yes	CAATCACTGAAGCAACAACAACAACAACAACACGAATAAAATACAAAAATGGCAGAAGTGAAATATAAATAAAAAAAAAATATTGAATCAAATGTGAATTGTAATAAAATAAAAAATATAAAATCAAATTGTATAATCTACGATAATCCAAAAGCCAAACAATCATGGCAGTAATAAAAATTAGTAAGAATAATATTAGTAATAGGCTACAAACGACGTCATTAGCAACAAACACATTAGCAACAAAAAGAACACGAGGAGCAATAATAAATTTTAAATATAATAAATACGGAAAAGTTGTGATATCATTATTAATTTCATTACTATTATCATGTTATCAAATCAACATGGTTTCATGTAGTGGTGGTAGTAGTTCGTTATTAGGTGATTGGAGCCATT…
DNAT_DROME	DNAT_DROME	DNAT_1	DNAT_DROME_1	TRINITY_DN3985_c0_g1_i14	A0A084VHU9|N-acetyltransferase^A0A084VHU9|N-acetyltransferase^Q:240-836,H:21-220^53%ID^E:1.6e-57^.^.	220.21	-1.41913	-2.67423	0.138043	-6.07874	1.21e-09	5.17e-07	Yes	TTTTGATATTATTAGTACGAAATATTTCGGTGCCAAGAATCATAAAATATTTTTATATATTTTTTTTTAATGTGAGCTGATAAGAAACCAAATTGTTCAATGAAATTTTTTAAACGAATATTTTTTTAAATTACAATTATTTTAAAAGAATATAAAACCAGACAAACCAAAAATAAAATAAAATGTTGGATAATAAAACACTTGAATACATAAAACTTTTGCCAGTGCATCATGAAGCTGTGTTGGAACACTTGCGAAACACATTTTTTGCCGATGAACCACTAAATAAAGGGACGAAGCTGTGCCAACGTGGCGAAGGTCATCCAGAATTAGAAGAGGTTGTGATTGATACATTCAAGGATGATATTAGCATTGTTGCGGTCACTAAAGACGGTGATG…
Unidentified	Unidentified	Unidentified_5	Unidentified_5	TRINITY_DN1312_c4_g1_i3	.	32.623	-1.41844	-2.67296	0.180935	-4.63392	3.59e-06	0.000996729	No	GTATATATCTGAAATGGAGTTAAAATCATATTTTATTTTCTCTCTTATATTTTCTTGTTTAAAAAAAGGAACGTCAAACAAGCGTAAAGATATACATCCGTTTTATATTGCCATGACTGTTATAGGTATAAACTTTAAAAGAATGAAAGAAAATCATTTCTTGCTTATTACACGAATCGTTTCACATGTAAGATGAAATTTAATGAAAAAAACGACGATAGCAGACAAGGCAAATAATAATAATAATAATAATAAATATGTACCCTTCGTATAATAATATCTTGGAATAAGGAATTTATTTTTCAATTTTGAAAAAAAAATGTATATTTTCTTAGGGTGGCTTTGATTCAAGATTGTTTAAGATTGGAGAAAAGCTGGATGAAACTGTTTATTTAGAAA…
LPLA_BDEBA	LPLA_BDEBA	LPLA_1	LPLA_BDEBA_1	TRINITY_DN52870_c0_g1_i6	A0A023ERV1|BPL/LPL^A0A023ERV1|BPL/LPL^Q:447-1,H:181-329^65.8%ID^E:3.3e-47^.^.	92.9138	-1.36621	-2.57793	0.161203	-4.87715	1.08e-06	0.000354353	Yes	TTTGGTTTTTTTTCCATAACACCAATCAAATGAAGAAATTGTATATTTATTTTCTTTTAATCCAGGTAACATTTTTTCTTTTGTTTTAATCAAATTGAAGCCTCTTTGTTTCTCGAGAAGTTCCAGACCACGATCAACTAACTCTGATGCAGGTGTACGTAGATATTCTTTTCCAATTGCAGAGTGTAGTTGTGGCATATTAATTTTTCTATTTATATCAATCAAATTCTTTATGGATGATCTTACAGATGGAGTTGCTTTGCTTTGTTTTTCAGAGTCAGTTTTAGCTAGAGAATTTCTGAGGTGGTCCTTATTAGAGTTCACTAAGAGTGTGCAATGGTGATAAGCGTTAGGTTGACCTAGTTTTGCAGCTGTTCCGGAAATCTTTTTACCGAAAAT…
LIPT_MOUSE	LIPT_MOUSE	LIPT_3	LIPT_MOUSE_2	TRINITY_DN31810_c1_g1_i1	A0A023ERV1|BPL/LPL^A0A023ERV1|BPL/LPL^Q:114-623,H:10-182^51.4%ID^E:8.1e-44^.^.	58.4239	-1.35924	-2.5655	0.186135	-4.18644	2.83e-05	0.0065427	Yes	GTAAAATTAGGGAGACAGTTGAAAATTTGCAATTCTGTATAAGGTTTTACTATCAAAAGTAGGTATTTATATTCAAAATGGCTGCTCCTATCATTGTTGGTAGTGTGTGTCGCAACACAGAGGCACGTTTCGCCTATATTTTGTTCAACGCAACATCGACAAGGCCTGTTCAACCCATATTGTCAGCTGTTCTCCAGTCGGCAAGTTTGTCTACTGAGGTTTTCAACAGCAGCAGGAACATTCCAAGGCACTCCTCCAAGTACATTGAGAGTGTGCCTGACAGAGAAATTCGAAAATCTGTTTTCGTCTCACAATCTGATAGTGTCTTTGCAAATCTTGCCCTAGAAGATTGGATTTGTAAGAGTTTTGATTTTGCACATCATCATGTCTTGATGTTGT…
LIPT_MOUSE	LIPT_MOUSE	LIPT_4	LIPT_MOUSE_3	TRINITY_DN52870_c0_g2_i3	A0A023ERV1|BPL/LPL^A0A023ERV1|BPL/LPL^Q:384-1,H:85-212^73.4%ID^E:5.9e-53^.^.	497.694	-1.35337	-2.55508	0.0718565	-10.7627	5.17e-27	8.35e-24	Yes	AGGTTGACCTAGTTTTGCAGCTGGTCCGGAAATCTTTTTACGGAAAATTGTTATATCATCACGGTCCTATACATCAGCAATTATTGTGTATACACAGTACAAAGCTCTTGTGATAACATTCAAATTATATGTTCGGTTGTAACGTTCACGTGGCGTAAAAAAGGTGCAATTCAAATTTCCACGATCATGGAACACGGCGCCTCCACCACTATTGCGTCTTTCCAATGCAATATTATTGTTATTCATGTACGTTATGTTTGCTTCCGAAAATGGATTTTGATGACGGCCAATTACGACACATGGATTATTGGACCACAACATCAAGACATGATGATGTGCAAAATCAAAATTCTTATAAATCCAATCTTCAAGGGCAAGATTTGC
LIPT_BOVIN	LIPT_BOVIN	LIPT_1	LIPT_BOVN_1	TRINITY_DN10814_c4_g1_i1	A0A023ERV1|BPL/LPL^A0A023ERV1|BPL/LPL^Q:411-1,H:103-239^73.7%ID^E:3.3e-54^.^.	286.119	-1.34701	-2.54385	0.0870956	-8.80657	1.29e-18	1.15e-15	Yes	TTCTTAGTCAGTTTTAGCAAGAGTATTTCTGAGGTGGTACTTATTAGAGTTCTCTAAGAGTGTGCAATGGTGATAAGCGTTATGTTGACCTAGTTTTGCAGCTGTTCCGGAAATCTTTTTACCTAAAATTGTAATATCATCACGGTCCGATACATCAGCACTTTTTGTGTATTCCCTGTACAATGCTATTGTGATATCATTCAAATTATATGTTCGGTTGTAACGTTCACGTGGCGTAAAAAAGGTGCAATTCAAATTTCCACGATCATGGAACACGGAGCCTCCACCACTATTGCGTCTTGCCAATGCAATATTATTGTTATTCAGGTACGTTATATTTGCTTCCGAAAATGGATTTTGATGACGGCCAATTACGACACATGGATTATTGGACCACAA…
PPR3C_HUMAN	PPR3C_HUMAN	PPR3C_1	PPR3C_HUMAN_1	TRINITY_DN3932_c2_g1_i14	A0A084W514|CBM21^A0A084W514|CBM21^Q:953-1759,H:1-321^46.3%ID^E:2e-72^.^.	105.448	-1.30699	-2.47425	0.160187	-4.53839	5.67e-06	0.00146059	Yes	TATAATTATTTAATCAATAAAACAGTGATAATTTTGATTTAAAATCAATCAATCAAAAATTAAATTTAAGATGAGTCAAAATAAATTTAAAAAAAAATATTCCAAAATATTAATTTATGACACGTTGTCAACATAAATTATGATTTAAACTTCCACATTCTTCATTCATAATAGAAATCACCATGATTTTTAAAATAATTTATGTGTGTAACGAAATTATCTATATACTAATAATAGAATATACATAAATGCATCTACAAAGTTTGAGATCATTCCTTTTTGTTGTATAACGTTACCAAAGTTACATTATGTACCAGTAAGTTAAAAAAAATGTTGTTTCCCCTGCTGTTGAATATGTAATACATGTACGTTGTAAAATATTCACTCACTCAGCTTCGT…
Unidentified	Unidentified	Unidentified_29	Unidentified_29	TRINITY_DN697_c15_g1_i1	A0A084WRA9|SERTA^A0A084WRA9|SERTA^Q:1242-1868,H:191-385^48.4%ID^E:1.7e-31^.^.	328.749	-1.29817	-2.45917	0.0749187	-9.58597	9.16e-22	1.16e-18	No	CAATATACGTCCACACAAAACACGTACACGCATACAACTCAGAGTACAACAACAACAACACAAGCAACAAAAAAAAAATATAATAATATAAAATATAATATGGACGGGTCTGAAAGCAAAGTAAAAACGAATGGTAGATTAGTAAGAATTTTGTTCTGCTATGAAATAGGTTGTTTAACACAAGCGCTGCGCAAAATTATTTTAAAATAAAATTTTCCTTGTGAATACGAATTCAACAAAAATTCACGTAGTCGTCTCGTTCGTTGTTTTGTTCAAAGTAAAAACAACTCTCAACACACATTTTACTTTCTGGTTGAACACAACAAAAAAATTTATATATATTAAATTTAAAAAAAAAATACATGTGAATTAAATTTAAATTTGAGAAAAAAAACCAGA…
LIPT_MOUSE	LIPT_MOUSE	LIPT_2	LIPT_MOUSE_1	TRINITY_DN1244_c3_g1_i1	A0A023ERV1|BPL/LPL^A0A023ERV1|BPL/LPL^Q:1855-668,H:10-418^61.6%ID^E:1.9e-140^.^.	21101.5	-1.28106	-2.43017	0.0418118	-16.7669	4.26e-63	1.51e-59	Yes	TCTTGATTTTTTTCATAAATTTTTTGAAGTGAAATTAAAACGTCAAGTATTTAAATTAAAAAAAAATAAAAGTAGTAAAAAATACTCAAATTTGAAACAAAGCTTTACATTTTTAACATAAACGGAAATAACGCTGGCTAAGATAAGATTAAATTGATAATTTTATTCTAATATTTATGTAACTTAAAAGTAATTTTATTATTTTGAAACTGTTTTTAATTTTAATTGAACAAGAAATAAAGTGTAATATTAAATAATAATGATTTTCTAAAGGCATCTGGTCCAAATTTGGCTGATTTTCAAGATCTGAATGACTGATATCACAAATTTATGTTAGATAAGATGCTGGTTTCTAAATTTATTGGAATAAGTAGAATAGATTTTGTCAAGAAAAAAAAT…
HXK2_DROME	HXK2_DROME	HXK2_1	HXK2_DROME_1	TRINITY_DN2892_c0_g1_i13	A0A067RFI2|Phosphotransferase^A0A067RFI2|Phosphotransferase^Q:1973-741,H:10-412^58.6%ID^E:3e-131^.^.	411.486	-1.25449	-2.38583	0.0752084	-8.96831	3.01e-19	2.97e-16	Yes	AAGGATCAAAGCGAGGTCCAAGTGAAAAACGGGAAACGCCAAACTTATTTTTTTTATATATAGGATGGGCCCCCAAAAGGAGTTTGCGTTCGGAGACGGTTTTTTGAAAATGTTAAGCAGTGTAATTTATTTCATTTTAGTCCATTTTTTCCATACAAAATATATCATTTTTTGTTTTTATTCATAGATATTTACATCCTTTAACATTACTTAACTCTAATAAAAAATTAATTTATAATTTTTCATTCATATAAAAGTAATCAGTAATGTATTTTCATTTTTCTTTTAACACAACCTCTAAATTAAATGGATTCTACTCCTATTTTAAATGCTTCTAATTTATTTTTTTCATACAAATTCAATTTAAATTACATCATCACTAAAATTTCTAGTCTAAAT…
NOC_DROME	NOC_DROME	NOC_2	NOC_DROME_2	TRINITY_DN1388_c1_g1_i2	A0A023ET30|C2H2-type^A0A023ET30|C2H2-type^Q:1850-408,H:1-484^50%ID^E:6e-109^.^.	1933.8	-1.22289	-2.33414	0.057669	-11.148	7.33e-29	1.3e-25	Yes	CTATTCTACAATATTATAATAATAATTAAGTTGAGAAAATTGAATTAATTTACAATGAAAATTGAATGACTTTATTAATAATAATTTAATTTTTAATTGAAGTTTAACATTAACATTTTTCGTGTTATGCTCTTCTAGAGTAATTAAATTTTAAGGAAATCATAAGAATAGAAACTCAATTTTACCTCAGACTTATAATTTAAGTTAATAATTTAACTGGTATTTGTTTTTTTTTCACTTATTTTTTTTCTTTTTTATATACAGAAATTAATCTTGTCAGCACTGTCATAATTTTTTAAGTTAAATTATTTTTCTAGTTTTATTATGTTTTTTTGTCATTTAATATCACAGAGTTCTGTCTATATTTAATAAATTCTAAAACCAACTGATGGTTAGAGT…
NOC_DROME	NOC_DROME	NOC_1	NOC_DROME_1	TRINITY_DN13736_c0_g1_i1	A0A023ET30|C2H2-type^A0A023ET30|C2H2-type^Q:641-3,H:105-318^47.7%ID^E:5.6e-36^.^.	181.253	-1.21565	-2.32246	0.0941245	-6.75331	1.45e-11	7.56e-09	Yes	TGATTATGTGCAGAATATTGACATCCAGTACAATATGGATATTAGCAAACTGGTACTAATGCTTCACAACCTGATGGCGTCTTAACTCTAGCGTAACTCATAAATGGTGTTTGTTGTGCTTGAGCTTGAGAATAACCAGCAGCAGCTGCTAACATTGCAGCGTGATGATGTGAAATACCGGCATATGGATTACGAAAAGCCGGATTTGCTTCCATTCCTGGATAAAGTCCCAAATGACTCATTCCTAATGCGTTTTTATAAGCATTGTAATCTTTTGGTGATCCATGCAATACTTCCATTCCCGAACGAATTATTGGGCTTGCACCTTTTTCAACAGGTGATCCAGACTTACGATCACCACTATTACTACCTGGAGTCGATTTTCCATTTTCAACTACA…
Unidentified	Unidentified	Unidentified_15	Unidentified_15	TRINITY_DN2890_c0_g2_i2	.	364.781	-1.13806	-2.20085	0.0942448	-5.92141	3.19e-09	1.32e-06	No	CGAAAATTACACTAAATAATGTGATCAGTTACAACCGTTTAAAATTGTGTATATTTTTCTTTACTAATAAAAAGTAAACAAAAAAATGCACTTTTTCATTTTAATATTTTTTTATTGTTCTATACATGACTGGATACATTTTTGATGCAAAAATATTTCTTTTAATAATATTTTTCATGTTCTATCATTCTTTTTTATATTTTTCTGTATTTTCCCTACTATTATAATAAATTAAATATATTTAATAATAATAAAATGTACAAAAATCATTGAAAATGGCTATTTAAAAATGAAATAATGGCGCATCTTACACACATTTTGCCACATAAAAATTTCAGGACCTGCGGTTGAAGTGGGAATCACGATGTATGTGCTGTCAATCAGTTCGCTGTCTGAAGT…
GROU_DROME	GROU_DROME	GROU_1	GROU_DROME_1	TRINITY_DN305_c0_g1_i1	A0A084W6R3|Groucho/TLE^A0A084W6R3|Groucho/TLE^Q:2887-599,H:71-835^80.6%ID^E:0^.^.	2258.16	-1.13714	-2.19944	0.0427522	-13.0318	8.07e-39	1.79e-35	Yes	TAAACATTTAACATCAATTTCTTTATTTTATCATTCTTTACTTTACTTCCATACCTTAAAATTATAATTTTAACTTATTCAAATATATTACACGCTAAATTAATGTACATTGAAATCTCATTTTTATAATTTTATTTTGTCTTATCGAGTTTTAATTAAAAATTTAAATTTTACTTATCTACAAAGTCTAAACTCATTTTCTTATTTACAGATATCAATACTTTAGAATAGTAATGTTTAACAGCATTTTTACAGTGAAAAACTGTCCTAACCATTAATACATATTATTGAAAACCTATGCTGAGATGGGTCCTTAACTACTTTTTTGTCCATAATTTTTTAATTGCTTACTTATTACAAGACAATACTTAAAATTATAAGCGCTGTTTTTTTCATCTA…
ADCY5_CANLF	ADCY5_CANLF	ADCY5_1	ADCY5_CANLF_1	TRINITY_DN2065_c1_g1_i1	A0A067RF30|adenylate^A0A067RF30|adenylate^Q:2612-96,H:2-855^52.1%ID^E:5.2e-235^.^.	100.701	-1.05443	-2.07689	0.121573	-3.90243	9.52e-05	0.0184037	Yes	ATTCACTGTATTTCCCCAAATGTCTGCAATGTACATCAATTAAATGAAGAAAAAATTTTATTTGATTAAATTTCAGTTGATTCAGTTAGCTTATTATTATGAAACGTACCATATTGTGGTTTTCTTGATCCAATTACTCCGGCAACTACACTTCCAATATTAATGCCAATTCTCATACGGAAATTATTAAATGAATGTTCATTTACATTTGTTATCTTCTGAAACAACTCGAGTCCATATTCAATCATGGCAAAAACATGTTGATGTCCTGTGGTGTCACACGTGTTGTTTGTTAGGCCACTAGCTGCCATGTATGTGCTGCCTGTACTTTTTATTTTTTCAACATAGCTAAATCTTTCCTGGGACAGCAATTCATCGAAATCAACAATTATTTCATTT…
H1_CHITH	H1_CHITH	H1_1	H1_CHITH_1	TRINITY_DN5099_c0_g1_i15	A0A067QJT4|H15^A0A067QJT4|H15^Q:1296-1604,H:1-107^63.6%ID^E:6.6e-24^.^.	1178.72	-1.05079	-2.07166	0.0762455	-6.17466	6.63e-10	3.02e-07	Yes	CACATCAATAAGAAATTAGGAAATTTAAGATATAATTAAACTAAATATACAGACAAAATGTTGATTAAAGTAAAGCGCAGAGATTTTGATGAAGTCAAATTTAAGACAAAGTATCTCAAATTATATCCGTTTCATTCAGAAAATCCTGTGTGACATGAATTTGGCCTCGATTTCAACAGGAGAATATGCCACCGTATAACTCTATAGACCATTCATACACGTACAACTGGGCGCCATGCAAACCCTGAAAGGTCTGAAGCCCAAAAGAGATAAAACTAAATATTTTCTGACTCTAAATTAAAAATTTTTTAAAATTCTTTGGTACTTCAACGAATCTGAATCACCAAGTTTTCCTCTAATGTAGCTTTGAGGGGTCGTTTATCTGTCATTTTCATTTTT…
ZN711_HUMAN	ZN711_HUMAN	ZN711_1	ZN711_HUMAN_1	TRINITY_DN6091_c0_g2_i2	A0A087RIY6|C2H2-type^A0A087RIY6|C2H2-type^Q:166-1326,H:390-750^20.5%ID^E:6e-08^.^.	209.674	-1.03011	-2.04218	0.0966432	-4.65746	3.2e-06	0.000903446	Yes	TGCCAACTGAAAATGATTAAATTAAAAGAATTGAGAGTTATTTTAAAACGAGTTGATTTAAATGATACAAAAAATTTCAACTGTAGCTCATCTCAAACAAAAATTGACTTAGAAACCGATGTAAACAAATTACAAAATCTCGAATTGTCGCCGAAACGATTTTATTGTGATATTTGTGAAAAATCTTACACCAAACGTTCATCACTCAAGTCCCATAAGCAAATTCATAAGGTTAACGATTTAAAATGTGACTATTGTGGTATAACATTTAATTACTCAAAAACTTTGAAACGTCATATTGCTGAAGTTCATTTAAAAATAGAACGAAAAAATTTTTCATGTGACTTATGTGATAGGAAATTTAAGGAAAAATTTTTAATTGAATCGCATATGATCAAC…
TOLL7_DROME	TOLL7_DROME	TOLL7_1	TOLL7_DROME_1	TRINITY_DN3792_c0_g2_i1	A0A084WHM2|TIR^A0A084WHM2|TIR^Q:2-1705,H:703-1271^63.7%ID^E:2.1e-187^.^.	1373.81	-1.02396	-2.0335	0.0477666	-9.29445	1.48e-20	1.64e-17	Yes	TCGTGCCGTATCTAAATTGGAACCAAATGATTTTTTATGTAGTTATGAAAAACACTGTTTTGCTTTATGTCATTGCTGTGATTTTGATGCATGTGATTGTAAGCAAACATGCCCGCATAATTGTAGTTGTTATCATGATCAAACATGGGGAACTAATATAGTTGATTGTGGAAATCAAAAAACATATAATATGCCAAAACGTATCCCAATGGATGCAACTGAAGTGTATTTAGATGGAAATGATTTTCCATTGCTAGAAGCACAAGTTTTTATTGGACGAAAAAATTTGCGTGCACTCTATGTGAACAACAGCAATATTGCATCTATTCAGAACCGAACATTTTCTGGTCTTCCATCTCTTGAATTGTTACATTTGGAAGATAATCGTATTCAAAAATT…
USH_DROME	USH_DROME	USH_1	USH_DROME_1	TRINITY_DN2193_c2_g1_i1	A0A084W832|Zinc^A0A084W832|Zinc^Q:460-3303,H:187-1300^42.3%ID^E:4.2e-193^.^.	1513.85	-1.02091	-2.0292	0.0375291	-11.7486	7.18e-32	1.42e-28	Yes	TAACCAGCAATTAATGATCATTTAATATTTTATGATATAAAAGATAAGAAAATAAAAGCATTTTGGAGATTAAATTAAATTTTAAATAATAATATTAATAAAAAATAATAAAAAACAGTGTCGTGATTTAAATTTAACATTTTGTGATTTAAACGAATTATAAACGGTCATCAAATGAAAATCATGTCACGGAGGAAGCAATCTAATCCAAAGCCGTTATTAAAACGAGAAGATGAAGAGAATCAAACGACAGAATTAACGGGATCATGTGATACCGAAACATCAGATTTGAATGCAAATTCAAACCCATCTAGTCCATCTCAAATAAGTGCAAGATCTGCCTCGCCCTCATCACAGATAAGTGAAACACCTTCTAGCATAGATAATAAATATTTAGAT…
ESMC_DROME	ESMC_DROME	ESMC_1	ESMC_DROME_1	TRINITY_DN13321_c0_g1_i2	A0A026WN86|Enhancer^A0A026WN86|Enhancer^Q:2245-1568,H:17-207^42.9%ID^E:1.9e-36^.^.	2333.35	-1.01561	-2.02175	0.0472367	-9.22178	2.92e-20	3.06e-17	Yes	ACATATTTCTCAAAATTACAATTTTTACGAAAAATGTCAAACCATTTGGAAAGATTGTGAACTGCGCTTTATCAATCAATTAATTATTTATTAGTTTTATAATTCTAATAGTTTTATCTTTCAATTATTTATGTTAAAACAATATAGACAATTTTGTTTCATATGTGCTGATGATGCATAAGATTGTAAAGAAAATACACCTATTTATTGTAAATGTATTGCTTATTAACGAGTTTGACACAAGCCATGCGGCACAAGCCATGAAAGTCGGACCGTGGGAAAGTAGTCTTTATATAAATCCCAAAACATATTACATATTTATAAGTCTTCTCGTATTAATATTTTTATGGTAGACATGTATAACACTCACTTAATATTATTATGTCGTATAACGTATAT…
ELBOW_DROME	ELBOW_DROME	ELBOW_1	ELBOW_DROME_1	TRINITY_DN4323_c0_g1_i1	A0A026VUV8|C2H2-type^A0A026VUV8|C2H2-type^Q:1784-435,H:23-527^43.5%ID^E:2e-67^.^.	1844.78	-0.957651	-1.94215	0.0427211	-8.83993	9.58e-19	8.96e-16	Yes	ATTTTAATATAAATAATTTTGTTTGTACACATTTTTTTTTTAAATTCGAATTTTTATTTTTTTTCATATTTGAATTATTATTAAATTTAATATTTAAATCTAGATTTTACATTTACGAGTTAAATTTAATAGATTTATTTGATTTTTTTTACAGTTTTCTTATTAAAATAGGTTTAATTTATTACATTACATCGCATCTAATAAGTCTTAATATGAAGATTTCTTTCTTTGATTCTACTACTTTCCTATTGGATCTGGAAATCTTGTTGAAACAACTACAAATATTATATTGCGTTACAAGGCAGAGAAACCACATTTTATCTTTTTTTTTGAGATTAATTTTATGTATTTGAGAGATGATATGTCATTTTTTTTAAATGAAAAATTATGTTATTGTAT…
Unidentified	Unidentified	Unidentified_9	Unidentified_9	TRINITY_DN2325_c1_g3_i1	A0A084WRE8|AGAP002461-PA-like^A0A084WRE8|AGAP002461-PA-like^Q:505-125,H:1-100^57.5%ID^E:1.2e-30^.^.	1171.96	-0.953886	-1.93708	0.0546877	-6.83675	8.1e-12	4.5e-09	No	GAAATTTTTCATTAAAATTTTAATCGAATTGGATAAATTTTTTTAAGTAAACATTTTTTTCTTTTATTTTAATAAAATTTCAATTAATAATTAAATTTAAATTAAAATTAAAATTAACGCCTTAATACACATAAATAGTTTTAAGTTGTGGCTTCAACTCTGGTGGTATGACTGGAGTTGATTCGTGATGCTTTCGCGACACTAACCGCTTAAATCTGCCAGAAAGTTGTTTTTTGAAACCATACAGGCCTTTCTTATCACTTTGTATCAACGCATCATGATTTGCTGCATTGTGAATGTATAGGTTTGGTTGTGGCGGTAGTGGTGGAAATACCCAATTTGATGGCGGTTGCTGCCTATATGTCACTGGTGGTGTTGATTCATTTGGTAACACAGCTT…
TOLL7_DROME	TOLL7_DROME	TOLL7_2	TOLL7_DROME2	TRINITY_DN955_c1_g1_i1	A0A084WHM2|TIR^A0A084WHM2|TIR^Q:2208-4,H:1-731^69.3%ID^E:3.4e-194^.^.	745.982	-0.952106	-1.93469	0.0612281	-6.07736	1.22e-09	5.17e-07	Yes	TGCATCAAAATCACAGCAATGACATAAAGCAAAACAGTGTTTTTCATAACTACATAAAAAATCTTTTGGTTCCAATTTAGATACGGCACGAATTGGTTCCCCTCTTGCATGTGGCATGATGCATTCTATATTGGATAAATCCATTATTTTCGGATGTTGGCGAGACGTCATATTATTCACTCTTTGAAGCCATTCCATTGTGCAATCACATTCAAACGGATTACCGCCCAAATAAAATTCGGGTAATGCTTTATGTGATGGTGAGGGTGCGATACGCAATTGGTGTAATTGTAATTTGTTTAATGCGTTCGCATACAGGTCGACACGTGCCAAATTAATTTTGTCAACAAATGTGTTTGGATGTATGGTGCTAATGTGGTTGTTGTTAATAAAAATCAA…
RIM2_DROME	RIM2_DROME	RIM2_1	RIM2_DROME_1	TRINITY_DN556_c1_g1_i1	A0A023ES66|Mitochondrial^A0A023ES66|Mitochondrial^Q:1230-178,H:34-422^64%ID^E:8.9e-133^.^.	2340.68	-0.947529	-1.92857	0.034266	-10.7258	7.7e-27	1.14e-23	Yes	TTTATATAAAATTAAAAAAAAAAATTTGTTAGTCCAAATTTATGATCGAGCAACCTCAATTGTGCTTTCACTTTCCTGATGATAGCCAGCTCCTCCACTAACAACCGAACTTGCACTGATATCTTCTTTAAATGAATCCCCATTTTGTGAATAAAACGCACCAGTGTGATAATATCTTGTAAGGAAATAAACCACAGCCTCATAAGTAGCCATCATAATTGCCGTGTTTGGAATTTGACGGACAAGTTGTGTAGCTAAACCTCTATAAATACCAGCCTTTCCCTCTTCTTTCCATACCGTATATAAAGTTTGCCAGAACGTACGATATTTGTTCCCCTCTTCACGCAGTCTTGTACGTGCAACTTCATGTGGATATGCAATGCATGATGCAACGGTTTT…
Unidentified	Unidentified	Unidentified_4	Unidentified_4	TRINITY_DN12268_c0_g1_i3	.	1454.57	-0.929784	-1.90499	0.0481782	-7.26021	3.87e-13	2.22e-10	No	TTATTTTTTTTATTCTTCTTTTTCCGAATTTTCTTCGCAATTTTTTTGGGTTTTTTTATGATGAAGTGCTAAAGCAACATTAATTTTAATGTAGCTTTAGCAGACAATTAAATTCCTGCTGTGTTGTCGATATTTTAATAACGAACATATGGTGTCATTATGTCTGTCATTAATAATTTTATTATATAGATGAGATCATCCTGTTTTTGCGTAGGTGCTTCTTTTTTTTCTACTGGAAGGAAAAAATTATGACAATAACAGCAGTCACTGATAAAATTCTAAATTTAAGTTTTACATTTCTTACATTTTTTGTTTTTGATACAAAGCAATTTCTGTTTGTTTTACTTTCTCTGTTTTATTTTACATTAAAAAAACTCCTTTTATTATATTACATTACAT…
FGFR1_DROME	FGFR1_DROME	FGFR1_1	FGFR1_DROME_1	TRINITY_DN3888_c0_g1_i2	A0A084VKS5|receptor^A0A084VKS5|receptor^Q:2273-3688,H:352-782^58.3%ID^E:1.5e-147^.^.`A0A084VKS5|receptor^A0A084VKS5|receptor^Q:1552-2055,H:244-408^44%ID^E:1.3e-34^.^.`A0A084VKS5|receptor^A0A084VKS5|receptor^Q:3939-4100,H:826-879^70.4%ID^E:1.5e-17^.^.`A0A084VKS5|receptor^A0A084VKS5|receptor^Q:3754-3885,H:783-826^77.3%ID^E:9.8e-14^.^.	1265.63	-0.92863	-1.90347	0.0456606	-7.63524	2.25e-14	1.43e-11	Yes	CCGACTTTTGACTGAAACGGTCGAACAAAATAAAAAAAAAACTTTTAATTTATTTATTTTTATTTTGGTTTCAATTTGAAAATAATTTATTTTTTATTCCACAAAAAAAATTAAGCACAATTTTTGTTGGTATTTTTTTGTAAAGAGGTCATTTAAACAATTCAAGGACTTTCATGTTTATTTTTAAAACAAAAAAAAAATAAGTAAAAGAAATTGAGAACGAAGATACACAAATAATTTTTTGTAATACAATAAATAAAAATAAAATTTTAAATAGTGACAAAATATTATTACACAAATAATAAAAAAAAAGATTAAAGCACCGGAAAATCTCATATGAAAAATGTATAGTGGATTATTTATAGAACAAGTTTCCGGAACAATTTTGCGTAATTCATT…
SAM11_MOUSE	SAM11_MOUSE	SAM11_1	SAM11_MOUSE_1	TRINITY_DN6187_c1_g1_i1	A0A084WGB6|SAM^A0A084WGB6|SAM^Q:1094-1291,H:24-90^65.7%ID^E:3.9e-15^.^.	376.092	-0.928427	-1.9032	0.0703884	-4.95007	7.42e-07	0.00025365	Yes	AATTAAACACCTACAAAACTGGTACAGATTAATTTTGATTGATATAAAAAAAAGGTTTTTGTTGCTATTTGTGTTTTTTTTGTTGTTTATTTTTAATTTATAACAGAAGAATTGTTTCTTTCAGAGTGAATGGATTAAATTTAATCAAAATAGGAAATTGATTTAAATACAAAACAGGTTTAAGTGACATTAAGTGAACTAAGTTAATTGAGAATGGTATCAAAACAGGATCAAATTTGCATTCTTTGTTGTGTCACATTCTAGTTAGAGAGTGGTTTTAATAGTGATGGTAAAATTAAAATGAGATAAAAACAAACTAAAAAAAATCCTCTAGAAATGAAAGCGTTACGATCAAGGATTTTTTATTGAATGGCATTCTCTGTACATGAACTGAATGCG…
NKD_AEDAE	NKD_AEDAE	NKD_1	NKD_AEDAE_1	TRINITY_DN856_c3_g1_i2	A0A084W8Q7|Protein^A0A084W8Q7|Protein^Q:2500-227,H:10-964^31.2%ID^E:4e-71^.^.	1371.02	-0.904823	-1.87231	0.0377652	-8.6011	7.9e-18	6.68e-15	Yes	CGTATACAATTTTTATAAAAGAATTATTCAATAATTGTAACAATTTTTTGTAAGATAAGCTCGATTAAATTTGTATTTTTTTTTTTTAATTTTATAATGAGATGAAGCAAAAGCGTAATTTAATTTATTCTTCGTCTTCGGCATCAAAATGGTGATAATGATGATGAATATGAACATATCGCGTTACAGTTGATGGTGTCGTATTTGAGGTAGTTGTTGATCCATTTACATTCTCCAGTGTCACGTTATTTTGTGGAATCTCCTCATGAATTTCCTCGTCTTTGATCAGTAAATTTTCACATTCAATTGGATCGGCCGCAATTGGTATCGACGCATATTCGATAATTCTTTGATTATTTGGAGTTGCTTGTTCAAGTGTTTTAATGGGTTTTCGCGTGG…
PICO_DROME	PICO_DROME	PICO_1	PICO_DROME_1	TRINITY_DN4791_c0_g1_i2	A0A034WCI5|Major^A0A034WCI5|Major^Q:1726-218,H:9-511^72.9%ID^E:1.6e-214^.^.	565.497	-0.863617	-1.81959	0.0725583	-3.90882	9.27e-05	0.0181204	Yes	CTTTGTTTTGGTTTTTTTTTGTTATCATTCAATTTTAATTTTAACCTAATTATTATTACTTTACTTTTCTTTCTTTTTTACATTGAATTAATTTAAATTTGATAATAAAAAATTAATAACAAAATCACAATTTTAACTGCATACCGTTGGGCTCATCGTCACCCGTGTGCCCGTTACTTGTAGTCGATCTCCTGTGTGTCAACTGTTGGTCAAGTGAAGTTTCGGTAATGTTTGCTACTGGCTTTGGTTCGGGATGGACATCATTTTCAGGGTTATCCCATGGTTGTCGTTTTCCACTACCGAAAATATTGTAAAATGTTGCACAGAAAATGTAAACACCGGCAGCAATGAAGAATACTTTTTGCCATGCTGCCATTGTTGGTTTTCCTTCGACTAAAA…
KI26L_DROME	KI26L_DROME	KI26L_3	KI26L_DROME_3	TRINITY_DN76899_c0_g1_i1	A0A084W5V1|Kinesin^A0A084W5V1|Kinesin^Q:6-458,H:995-1158^65.7%ID^E:3.6e-42^.^.	364.777	-0.854923	-1.80866	0.0521831	-5.26843	1.38e-07	5.1e-05	Yes	GTGCAAGATCATCAAGTTGACGTTGTCGTGATTGTCACAATTCCCTTAGTCGTACACCTAGTCAATCATCTCTGCCAAGTTTAAATGGAATTGTGGCAATCGCATGTATGGAACAATATGCTTCACTACGACATCCAGATGGTGCTTCCGATCCAAATTTACAAAAAATCGAACACAAAATCGATGAAACACTCAACAGACACATTGTTGAGAATCCTTTAGCTGATATCGATGAAAAACTTATTTTACAACACTTTAAATCGCCAAAATCCCCAACTTTGTTACAAAAACTTCCACTTTTACCGGTAAGTACACCAGAAACGTATGACAGTGAACAGGACTCAACACCGCGTACATCGAAACACTCGGAAATTTCACGGAGAGCTGAGAGTGGCTACC…
Unidentified	Unidentified	Unidentified_19	Unidentified_19	TRINITY_DN3591_c1_g1_i1	A0A034WPE7|MADF^A0A034WPE7|MADF^Q:577-296,H:17-111^32.7%ID^E:7.4e-10^.^.	4784.6	-0.84885	-1.80107	0.0584774	-4.5975	4.28e-06	0.00115181	No	CATCATCTTTTTCCTCCGAATCTGTTCGATGATCTTCTTGTACTGTAATTATTTCGGCATGTTGTTGTTGTTGTTGTTGTTGCTGCTGTTGTTGTGAATTGACTTGAATCTCATAATCGTCCTCCAAATGTTCTTCAATGACATTCGCTTCATAAATATCTTCAATTTCCACCTCATCATGAGACGACTGTGATTCTCTCATATCCATGTATGAAATTTCGACTTCAGATTCTGGTTCTTCTTTAGGTAAGGACTTAAATTGCTTGATAAAAAACTCATCTTTGACACTTTTGCTCTCATTCACAAATAAAAGGAGATCATAATACCATAATTGTGGTTTGTATTGATATCCAGAGAGACGAACCTTTCTGTAATCTCTCCTAAAACAAGCCCTCATAC…
ETS homologous factor	Unidentified	Unidentified_ETSHF_1	Unidentified_ETSHF_BRCO_1	TRINITY_DN4738_c0_g1_i4	A0A084VXM9|PNT^A0A084VXM9|PNT^Q:428-829,H:1-141^60%ID^E:6e-40^.^.	618.867	-0.846065	-1.79759	0.0540325	-4.92416	8.47e-07	0.000284212	No	ATAATAATAACAGTAACAATAATTTGAAAAAGAGCGGAAAATTATTAAATATAATAATAATAAATACAATACAAAAGAAAAGAATTCAAGAAGCACGAGAAGTAATGAAAAAAAAAACTTATTAATGTAATTTAAAGTTTCACATCAAAAGATTTGAGTTTGCTATTGTATTGTAACAAAAAAAAATATTAAAAACCACTTTTCCGTGTCGAACAACAAAAAAAATAAAAGAATTAATATAAATTTTAAAGAAAAAACAAATCTTTAGAGGAAAAAATACGTAAAATTGTTGCACCATCTGTTTTATGTGTTGAGCTGACGGAAAAGGTTTTTTTTTCTTCATCTTCTTGGCTTAAATTAAATAATTTATTCAAAAACGAACGGAAGAATTGACATTGT…
Unidentified	Unidentified	Unidentified_8	Unidentified_8	TRINITY_DN2076_c0_g1_i1	A0A084VT20|Uncharacterized^A0A084VT20|Uncharacterized^Q:1801-3708,H:90-874^34.8%ID^E:1.7e-80^.^.	3115.09	-0.840877	-1.79114	0.0339063	-7.69406	1.43e-14	9.39e-12	No	TACAAAATTACAAGAGGTGTTGCTATACAGTCTTAACCCAAACTCCAATTCTTTCGCTCTGGTGCCCCACTGGTTTTGGGTTGAGGGTGTACGACACTTAAAATTTGATTTTTCTCAAATAGTGCTTTTTTATTATACGTAAATAACGGATATATTTTTTGAAATCTCTTTCTATAATTTTAATTCATTGAAGACACCAACCTTATAAGAATGAAATGAAAAAACAAAAATCATGTTACTTTCAGTTAAATTCTCATATTGAATTGAAAAAGTAGAAAAGAAAGATTTTATCAGGATTTTTCCTGACGATCACTCCATTCTCTTACTTTAACACATTCGAGAGCAATTCTCTTTTACGACACTCTCTCTCTCTCCCACTCTCTTTTATATTTGATTGGT…
KI26L_DROME	KI26L_DROME	KI26L_1	KI26L_DROME_1	TRINITY_DN431_c6_g1_i5	A0A084W5V1|Kinesin^A0A084W5V1|Kinesin^Q:179-1699,H:649-1201^49.4%ID^E:8.7e-122^.^.`A0A084W5V1|Kinesin^A0A084W5V1|Kinesin^Q:1-285,H:579-683^40.6%ID^E:1.7e-08^.^.	3889.92	-0.816551	-1.76119	0.0290328	-8.1477	3.71e-16	3e-13	Yes	CCAAGAGTTTCAAGATCTAAGGTTGCTGAAGCTCGACATTTACTTAGAGAAATTAATCATGTAAAGAATAATGAAACATGGATAGATGGGCCAAAAACAACACCTCTTGCTCCATTAATACAAGGCGGCTTACCAAATGCTCCAAATTCAGCTGGTTATGGCTTTATGGATAGTCACAAAAAAATCAATGATACGACAATGGGTTGAGAATCAATCATCACAATTGCTGTTGCCAAATCAAGGTCAAATAACAGTTCAGCAACAAAGACAGATCATCACTGCACTTCAACAGGGCTTTGGTGGTAGTCAAATGATGGCAACTGCAGCAGCTATCACAACAATGACTAGCATGAATAATCGAAACATGAATGATGATCTTGCTTCCATTCATTCAAGAAG…
KEN1_CULQU	KEN1_CULQU	KEN1_1	KEN1_CULQU	TRINITY_DN3046_c2_g1_i7	A0A084VZR6|Transcription^A0A084VZR6|Transcription^Q:1823-111,H:1-721^49.7%ID^E:1.9e-138^.^.	784.86	-0.813762	-1.75779	0.0599447	-3.89962	9.63e-05	0.0184181	Yes	AATAATTTTGTTACTGTTGTGCAATTTATTGTCGTATTTTATTTATGTTTAAAAAAGAATTAAAATTAAGTTTTTATTTGTTTAAATTGTCTAAAATTGATTAAATACTATTCATGTAAATTTTTACTAAGTAGCAAGTTGTTATGATGTCCAGACAAATGCCGAACCAATTCTTGGAGTGTTTCAAAATACAGTGTACAGAAACAACATGTATATCGTCCACCAGCTTCTGGCGCATTAATGATATTTCGATGCACTGAACACAAATGTTTCAACAAATGTGCTTTTTGTTTGAACATTGCAACACATAATCGACATGCAAATGGTTTTTCGCCAGTATGTACCCTAAGATGTGTTTTCAAATTCCACGACATTCCAAATTGTTTGCCACAATACTCA…
LRK1_CAEEL	LRK1_CAEEL	LRK1_1	LRK1_CAEEL_1	TRINITY_DN1486_c2_g2_i6	A0A084WPJ1|non-specific^A0A084WPJ1|non-specific^Q:7394-3,H:39-2617^64%ID^E:0^.^.	23950.3	-0.800444	-1.74164	0.0278428	-7.91745	2.42e-15	1.72e-12	Yes	TCAACGACAATTATGCATCCCCATGTCGTACCAACATAAAGTTCTTGATTTAAGACTGTGATTGCTGTCACTTGACATTTGCCTGGACTCAGATGCTCTTCAATAGCGATGCTCTTGAGACTTTCCGAACATGGAACAAGTTTTGAGCAGTCAAGTTTGTTTTCGATTGATTTTTTCGGCACATTCCATTGATAGAGAATGCATCCGGGAGCAACATAGGCATACACATAGTTTTCCGATGACTCAAGAAGTGAAACATTTAGTCCTTTAAGGGGAATTGAAGATTGGTAGTGCGATAACGCATGATGACTTGTCACAACTGAATTTTGAAGCTCAAAAACGTTTATTGCACCGTCTGTTTCACCACACCACAATTCATATTCACCTTGTTGTTTCCAT…
GPAT1_PIG	GPAT1_PIG	GPAT1_1	GPAT1_PIG_1	TRINITY_DN474_c0_g1_i1	A0A084VEH3|Phospholipid/glycerol^A0A084VEH3|Phospholipid/glycerol^Q:2522-240,H:50-828^55.8%ID^E:1.2e-235^.^.	13680.9	-0.778561	-1.71542	0.0316502	-6.27363	3.53e-10	1.69e-07	Yes	TTTTAATTCTTCAAATTTTATTTGTAACTGTAATTTTTAAGTCATTTTTTCCGATTTTAAGTAGTTTTCCATTAGTAAAAAACAACAGTTCATCTCTTAAAACTAATTAACTAACTAAACTAATTTTAAGTTCATCAAGTCTATGGTCAACACCATAAAATTTCATAATTTTGAGCATTATTAATATTATTAACATTCTTCTTCCAGAAGATCAAAGGACACAAGAGCATGTTTTAACATGGAATAAATTTCTTAATTCTATTAATTGTATTATTTATCCCGATTTTTGAATCATAAACTGGATTGAGGGAGAGAAGTCTTGCTCCAGTTCTTGTCGATATATCCACAATACTCCATTTTTCAAGTAACTTAATGCAATTTCTAATTGAATCTGTGGAA…
KI26L_DROME	KI26L_DROME	KI26L_2	KI26L_DROME_2	TRINITY_DN6921_c1_g1_i6	A0A084W5V1|Kinesin^A0A084W5V1|Kinesin^Q:1547-3,H:16-589^63%ID^E:7.3e-184^.^.	3411.85	-0.766707	-1.70138	0.0465915	-4.00731	6.14e-05	0.0128458	Yes	CGAGCTTCAGCAACCTTAGATCTTGAAACTCTTGGGCCATCAATCCATTGTTCTGGGGTGACAAATGATTGTTGTTGTTGCTGCTGCTGCTGTTGTTGTTGCTGCTGTTGTTGAGCTCGTTTCAATGGAGATCCCTTTGGAGTTGGTATATTTGATCCTTTACTTACACCAATATTCGGATTTTGTTTAATCGATCTTGACACAGAGAAGGTTTGACTTTCAGGAATATGTCGTTTAGGTGATTCAGTTCGATGTTGATTCATAACAGGACTATATGACTTTGGTGGAGTTATTTTTTTCAAGGGTGATTTGTTTAATTTATCTGCAGTCGAGCCTCTTAATGCTTTGTTCATGGCACATCTGTTATCTCCTGAATTGAGACTTGGCAAATACACGGGG…
EYA_DROME	EYA_DROME	EYA_1	EYA_DROME_1	TRINITY_DN1801_c0_g1_i28	A0A034W0P9|Eyes^A0A034W0P9|Eyes^Q:3400-4782,H:346-823^61.3%ID^E:1.8e-150^.^.	10146.6	-0.75154	-1.68359	0.0360931	-4.75271	2.01e-06	0.00062604	Yes	AATAAAGGTGAATAAAAAATAATCCTCAAAAACATCTGAATAGTGTTCCAACATTTTAAAATTAAATATTTAAAAAAAAGTTTTATGTGTAATAAAGAAGTGTTGCCAAAAATTAAAATTCTCACAAAATTTATCGGAACATATTGAACATTATTAACAAAAGGTACACAAAATAAAATGATGTATTTCTTTATTTACTATTCTGTTCTTTACTCTAGTTTTCTTTGAGAAGAATGTCTCCCAAAAAATATTTTGCTATAATGTATTTTTTCCTTGTTATGTATTTGTCGTTGTTGTTCAACATTTGAGCAACGAAGATTGAACAAGCAAGTTTTTGTGATATAACACAGGAATTATGCAGTAAAATTTTAATTTAATATTACAAACAAAACATTGAAC…
Unidentified	Unidentified	Unidentified_16	Unidentified_16	TRINITY_DN292_c7_g1_i2	.	1267.77	-0.733459	-1.66262	0.0403331	-3.8048	0.00014192	0.0265599	No	TTACCAAAGAATGTACACCTGGATTTTCACTCACTGTACTTAATTCCCCAAAAAACTTTGAAGAACTATTAAAATTTTTATTTTTATTATTATTGTTATTACATTTAAATAATGCTTCATTTCCTTCCTCTATCATTCTCGTATCAGGATAAATTTGTGGTGTTGTTGTTGTACCAAAACTTTCATACAATTTCTGTTGAAAATATTTTAATACATTTGGTTGTAATATATTTGGCATTGCAAGTGTTTGATTTAAACTCAAATTTTCATTCACATTTAATGATTTGACTTGATCTTGGAACATGTTCGTGTCATTTTGCATATTACTTTTGTTATTTAAAGGAATGTTACTAGGAGTTGGAATTGGAGGTCGTACAATTTTTTTTATTGTAGTACCAG…
SELB_HUMAN	SELB_HUMAN	SELB_1	SELB_HUMAN_1	TRINITY_DN185_c0_g1_i2	A0A084VDH4|Tr-type^A0A084VDH4|Tr-type^Q:1984-434,H:3-522^49%ID^E:1.4e-140^.^.	676.229	0.812219	1.75591	0.0537659	4.31908	1.57e-05	0.00376445	Yes	CAGAAGTGAAGTGTAATTTAGATGATTTTGGTGTAAATAAAAAACTGTCTGAATTTTAACTCATTAACGACCACTACTAGAAATGTTGAGTTTCAGCAAAACTTTCTTCTAGGATTTGTTCTTTGACTTAAAGACTTTGACTCAAAATTTTCATCGAAATGAAAAGTATTCAGAGTTTCATACAAAAATTTTACGGGAGAGCCGATTGAAAGTGTCGTATAATTCCATGGAAATCCGTACAGAAATCTTGTACGAAAGGGGTAAAATTGCATGACTTTTCATCTTATTTCTGTTAATAATATTCTTATTTTAATCCAAAAAGTTCAAATTACTGAAAAAAGTTAAAAAAATATTCTGAGAACTCCTTGATGAAATCGACCTCCATAGAAGGTCCTGAAA…
PTP10_DROME	PTP10_DROME	PTP10_1	PTP10_DROME_1	TRINITY_DN1509_c1_g1_i4	A0A084VIB2|protein-tyrosine-phosphatase^A0A084VIB2|protein-tyrosine-phosphatase^Q:3715-641,H:46-1078^33.9%ID^E:3.2e-157^.^.	6288.84	0.821625	1.7674	0.0307175	7.86603	3.66e-15	2.5e-12	Yes	ATTTTATTGTTCATGTTAAATTTGCACTACACACAAATCAAAATATTTACATTTTTTGTGAGTGACTTAAAGACATTCATTGCGTTTTTTGTGAGTTACCGAGAGTTACAATGAGTTACTTTCAAAAAAATTCATTTAAACACATGGCTTAACCGTTAATTTTTGAGGACTTATTAAAAGAATTAAACACAAAAAAAATTAATTTAACATTTTTTATTTTTATTCAAAGAATTTTAATATAAATATATTTGTTCAACATTATTTGACTTTAAAAAGCAGGATTTTTAGAGAAAAAAATTAAGAATTGGAAGACATTTCAAATGTTTCATTATAAAAATCCTGCTTCTTCCTTAAAATTATAAAAAAACACATTTGTAACATAAAATATGACACTTTAAG…
ATG2B_MOUSE	ATG2B_MOUSE	ATG2B_1	ATG2B_MOUSE_1	TRINITY_DN640_c5_g1_i17	A0A084VCJ1|Autophagy-related^A0A084VCJ1|Autophagy-related^Q:6603-109,H:78-2507^46%ID^E:0^.^.	4979.53	0.832219	1.78042	0.031423	8.02659	1e-15	7.75e-13	Yes	TACTTTTCTCATTTGAATAAAATTAACTTTATTGAAATTAAAAAAAAAACTTAAAACTGGAACATACATAAAAGAAATTTAAAAAAAATAAATTTCTCATCACTTTTACTCTTCTTCATCTTTCCATTTTTCCTTCGCTTCCATTCTTGCATCAGGAACCAGCTGATTTTTAACACCACTCAATACATTTGACGTCGCTTGAGTTGCCAGTACAAGTGGGCGAACAGCTGTTGGTGGTATCTGTCGTAAAACTGCACCAACCGCACCCACAGCTCCTTTCTGATCATGTTCTAGAGCTGCCATTTCACAAATTTGAATTGCAGTGTCACCAATACCCTCTTTCATTACTTCATAAGCCCTTGCCACACCTTCACGAATATCTTGTGGTGGATGAAGACG…
TRAF4_MOUSE	TRAF4_MOUSE	TRAF4_1	TRAF4_MOUSE_1	TRINITY_DN4393_c0_g1_i2	A0A084WQR8|TNF^A0A084WQR8|TNF^Q:539-1933,H:1-482^82.6%ID^E:3.5e-241^.^.	3331.57	0.839956	1.79	0.0548559	4.7389	2.15e-06	0.000658621	Yes	ATTAAATTTCCCCTTATTTATTTTATTTATTTTTTTTTGATAAAATTCGTATGAATGAAATTTAAAAGAAAACGCAGCTGTCTTTTGTGTGTATACAGCAATACAATCCGATTTTGGTGCATTTTTAATACTATTAATTTGTATTTCACATACAACATGGTTCTCGTAGAAACGAATGTTGGTTTGTTTAATTTCAACTACATGAATTTGAATTGTATATTTGTGTTGAAGTCAGTCATGATTTAGACGTCCAACAAAAAAGTCGTGAAATTACGTTAAAATTAAAATAATTTAATCTAAACGAATATTATTTGAAATATAAAATTAAAAAAAAAAGAATATAAATAAGAAAATATAATTTCATAATATCAAGTGATTTTTTTATACAGCTCAAAGTTA…
ARL3_TAEGU	ARL3_TAEGU	ARL3_1	ARL3_TAEGU_1	TRINITY_DN1663_c4_g1_i1	A0A084WP51|AGAP004497-PA-like^A0A084WP51|AGAP004497-PA-like^Q:1815-3230,H:26-509^53%ID^E:2.9e-136^.^.	279.476	0.896705	1.86181	0.0836192	3.78747	0.000152187	0.0281847	Yes	ACATTGATGAATGGTCCAGAAAATAAATTTACATTTGAAATTGAGAATCACCTCCTTCAACAATTATCGAGTAAAAATATTTCAAGTGATCACGTGTGTTATAAAACAAATGCTGTGAAATGCATTGAAAGCAGCTGTGATAAATATTCAATTTGTAATTTATCTGGGGGGAATAAATTTGATGACACTGATAAATTGATCATCAGTCACACAACTGAGAGAATTCAAGTGCCAAGATTAGAAGAAAATCCTGTTGTGATCTTAATTAGGATTGGTGTTGTATTCCTTTTTATCTGTAGTTGTATTTGGATTTTGCTTCAAAGTAAATGGTTTAGATATCAAAAAGAGACTGCGTCCTACAGTGTTATAAATCTTAAAAACAAGAAGCAAACCAACGGT…
serine-rich adhesiin for platelets isoform X1	Unidentified	Unidentified_SRAP_1	Unidentified_SRAP_ANST_1	TRINITY_DN11539_c0_g1_i1	A0A084VHN5|DUF4739^A0A084VHN5|DUF4739^Q:3881-357,H:42-1357^32.9%ID^E:3.2e-88^.^.	7109.86	0.92124	1.89374	0.0463947	7.35515	1.91e-13	1.13e-10	No	GTTACGCAAAGAACAAATCCTAGAAGAAAATTTTGCTCTAAACTCAATATTTCTAGGAGAGGCGGTTAATGGGTTAAAATTAGTTCGATTTAACTTTTAAATGTATTTTTTTCCTTAAATGATCATCGATATCCAATTAAAGAGAATTTTTTTAATAAAAAAGCTACTTTTTGGTCCTAATTTATAGATTCTTTCGATTTGAAAATCAAACGCTCAGGGCAAAATGAAATTTAATGTTAAATATTATTACTTTAACTATATTTTTATTATTAATTAAAAGTGTGCATAACTACAAATTTTTATCACAAGCATAACTTTATATCATCAATTGAAAGGGGTTTAAGGATAATTTTTTATTTGAAACCCTCTTTTGCTCTCTTTTCCCATTCAGCTCGTCTC…
PP1RA_MOUSE	PP1RA_MOUSE	PP1RA_1	PP1RA_MOUSE_1	TRINITY_DN3872_c0_g1_i24	A0A034VYG5|Serine/threonine-protein^A0A034VYG5|Serine/threonine-protein^Q:3498-1045,H:1-1028^36%ID^E:6e-93^.^.`A0A034VYG5|Serine/threonine-protein^A0A034VYG5|Serine/threonine-protein^Q:4270-7206,H:1-1231^34.2%ID^E:8.1e-90^.^.	5309.06	0.948139	1.92938	0.0492787	7.47054	7.99e-14	4.9e-11	Yes	AGGCGACAAATTAAATTGAAATTAAAAATGAAAAAGTAAATAAAAATCCTCCCTAACATATTAATTACTTCCTGTCTCTTCTTCTCTTGATTTTGAAATTTAACTTATTTTTTTTTTTTGATTATCAATTTACTTTATTGCTTAAATTATCATTTACTTTACATATTTTGTAGTTAATTGTTACAAACTTATTACTATACATTTAATGTTTATAATTGTTGAATATCAAATAATTTCTCTTTTTACTAAGAGTTTTGACGAATCTTTTAATTTTTATTTTAATATACTTTTTAGCTTTAACTGAAACTTTAATCTTTCTAATCTTTCTTCTCCTGTCATTTTTCTGAGTTTAATTTTAGCAAGTGCTTTTTCTGAACCTATATTTTGATATGAAGATAC…
Unidentified	Unidentified	Unidentified_14	Unidentified_14	TRINITY_DN2860_c1_g1_i2	.	1220.25	0.992417	1.98952	0.0833133	4.95019	7.41e-07	0.00025365	No	ATTGACCAGTATTAAAAAAAAACTAGAATATCATATCATTTGATTCCTATTTGAATAATTATTTTATTTAACTTAAATTGCATTAATCATAAAAATAAATAATATTTAATAAAAAAAAAACAGATGCCTTCCAGAAACGACACTGCTATGCATTGCTTTGTCTCAAAACTTCTGTGTTAAGGTTATCAGTGATTTTTAAATAAAAAATAACAATATAAAATTTAAAAAATCAAATTAAAAGTCCTTTACAAACATAAGTCCTATTTTAATATGAATAAAAATTTAAAAAAAAAATCAAATATTATAATTTATAAAAAAACATTAATAAAAAAAATAAACTATATTATATACAGTAAAGAGCTTTGATGTTTCCCTATTATATGAAACAAAAGTTTTATA…
Unidentified	Unidentified	Unidentified_23	Unidentified_23	TRINITY_DN4071_c0_g2_i7	.	445.467	1.00418	2.0058	0.0956267	4.4358	9.17e-06	0.00232983	No	ATAAAATACCAGGCGTTTCCACTGTTTATAACTTTTTAAACGTCTTATTTCAATATAACTCGTTTCACACTCAATTTTTTTTTAAGATTTTGTATAATGTTAAAAATTTATAATAAATTACCCTTAAAATTATTACAATGAATTTTGATAATATTCGTTTCATACCAATTTTTTTTTAATGTCGTTCTTAAAAATTCGGAAAATCACAAATTTGACCTTTAATATAGCAATCAATGAAAATCTTTTCAACAAAATACCAGGCGTTTCCACTTTTTAATAAGAAAAATTGAAGTAAATTCATTTTTATTGTTTGAACTAAAATACAAAAATTATTTTTAAAATTGTACTGAATACAAAACAAGGCGTTTCCATTAATTTAACCTATAATTTCAATAATAT…
VF143_IIV6	VF143_IIV6	VF143_1	VF143_IIV6_1	TRINITY_DN3574_c0_g1_i5	A0A060YDB7|Deoxynucleoside^A0A060YDB7|Deoxynucleoside^Q:1008-1571,H:16-213^29.1%ID^E:3.3e-16^.^.	122.139	1.02255	2.0315	0.120546	3.67119	0.000241427	0.0429233	Yes	AAAGCGTCTTAACAATGTTTGTAAAAACTCAAACACATATTCAAAACTTGAGGATTTGAAAAAAAACAAAAAATTTAAAATTATTAATTTAACCAAAAAAAGCACAAAATTTGGAGACAGTATTTTATGTCAACTGGAAAATCAAAAAAGTGTGTTTTTACATCATACGGTTTCAAAATTGTTACTCGAGTCGGATGAAATTTTAAACAGATTGAGTGATAAAACAATGTAATATTAGAACTACCTTGCGAGCAACTTGTAAAAACTCCAAGAGATGTGGATCGAGAAGCCACAAAAGTGTGTTAGTATTTTCAAAATGTACTGCTGTCAAAGGAATTATCAATTTTATTGCTACTCCGAATTTACATTCTAAATAAATGAAAAATTCTAGGTTATTTA…
NAAT1_DROWI	NAAT1_DROWI	NAAT1_1	NAAT1_DROWI_1	TRINITY_DN6656_c0_g1_i23	A0A084WUP8|Transporter^A0A084WUP8|Transporter^Q:1934-174,H:488-1061^54.1%ID^E:4.5e-186^.^.	2810.05	1.02636	2.03688	0.0447213	9.98095	1.85e-23	2.53e-20	Yes	TTTTGTTCTTGGATACTTTATTTTGTAATTAAATTGAAACACTCAATGCATAGACATTACTTCATGTTGAAACCTGAAGGGTCTTAACCAAAAAGTTTCTTTTTAACATAAAATATGAATCCTTGTGTTAATCCTTTTTCGATAAAAATCAATCGAAATGAATTATCATTATATTCTACTTCTTTCAAGTATTTAAGATATTTTACACGTAAGTCTGGATCTCTTGGTCCCCAGTCGGCAGTAGGTTTAAATGCGTCAAATATCTTTTCAACCAAAGTTGTACTTTTTTGTTGCATAATTGCAATTACCATCCAAACAGGCACTTGAAGAACTATTAAAGATGTGAGGCAGTATCCTATTATTTTATATCCTGTTGGAAATGGAATCAACACTTCACCA…
Unidentified	Unidentified	Unidentified_28	Unidentified_28	TRINITY_DN687_c9_g1_i1	.	272.961	1.02701	2.0378	0.108843	4.10695	4.01e-05	0.00869261	No	TTACTTAATTCCACCACTTTATTTATCATCAGCATCTTGTATTTAAATTCACACACACACACACACACACACTAATTTTCTGTGTAAAATAATATTTTTTATAATAGTGCTTAGTGTTTTTCCATAACAAACAAGAATATTATGAGTATTATTATGATTATTATAATAAAAGTCAGGGTATGGTTTTTCCATTTTCTCGTTTCTTCACTCATTCTTTTGCCTTTGTACGCTCCAGTCTTTTGTTATACATGATAATTTCTCGGTGGTTTTGCGTTTCAAAAAGAAGTACAGAGAAAAAAAAATTAAAAACAGGATCTTTTAAATTGAGTGTAATATTATGTCATGATCATGTTCATTACTGAGGTACAAAAATTCTCGAGAGATTTTAATATTGTAATG…
CLUMA_CG007071 isoform A	Unidentified	Unidentified_CLUMA_1	Unidentified_CLUMA_1	TRINITY_DN5460_c0_g1_i22	A0A084WNG4|Uncharacterized^A0A084WNG4|Uncharacterized^Q:3344-3027,H:26-136^58.6%ID^E:5.8e-24^.^.	144.032	1.09678	2.13877	0.130453	3.96144	7.45e-05	0.0152245	No	GTTACGGTTGGAAGTCCCATTTTTGAGCATGACACGAAAATCAATTCAATGAACCATTTTGGGGCTATGATTTTTTTGGAGTCTAAGATTTGAGCCGAATTTTATGGCAAAACCTGATGAGCAAATAAAGCAATAATGAAAGGTAATTTCAGAGTAACGGTACACAAACCGTCTGTTATAGTCAGGGACGGACTCACTTTAATTAAATTTGCATTCAAATTTATAATCTTTTATACATTTATTTACTAAACACTTTCATTTTCCACCATGACATCATGAATCCAAAATAAGTATGGCTCAATTCTCAGGGCAACACTAGGAAACGTGTCTTGCAGCGAGCAACTTTGCATTCCCGGTCTAAATAATATCCCGATCAAGGTATTTCCTCCAATTAATGGT…
Unidentified	Unidentified	Unidentified_10	Unidentified_10	TRINITY_DN2466_c0_g1_i1	.	113.27	1.09731	2.13955	0.129697	3.9886	6.65e-05	0.0137405	No	GCTTAAATGAAATACAAAACAAACTTTTTTAAATTAAAATTAAAATAAATATTTATATCACTTTATCAGCCTGTACAATAGTGGTCCATTATATCCAAAAATAATTCCAGCATTGGGATGGGGTGCAAATTCCAAGCAATTCAAATCCCAGTTTTTGTTTGTCTTGAGAGTGCGAAAATTCTTTGGATTATTTGTGTTTTCATTTTTCCCTGTCAAATCATAAAAAATCGCATACGTTTCAAACAAATAACCTGGAAGGCCTTTTTTGAATCCAATCAATAGATTGTGTCGTGATGGTGATACGGAAAAAAAATAATAGAAACTTGGAAAATTTTTCAATACATGCGTGCGTTGTCCAAAATTTTCACTCCGAATACTGATTACTTCAATTGTGAGAAG…
Zinc finger protein	Unidentified	Unidentified_ZFP_1	Unidentified_ZFP_OSFU_1	TRINITY_DN2723_c0_g1_i6	.	68.8598	1.17924	2.26457	0.126543	4.73545	2.19e-06	0.000658621	No	ATTATCCTCATTATTTGACAGTTGTTCTTTTGAGTTTTCACATTTTCCACAATCTTCTCGTACATTTCCACACACATTCAGTGTATTGTCAAAAAAAAATTATTCATATAGGTGAAAAGGAGTAAGGCGTAACTTTTTTCCATCAAATAATTACGAATTTTATCAAATATTCCAATTCATTTCAAACTATTTGGATCATTAAGTGCAATAGATAATTGGAATTTGTGGTAATTTATATAGAAAAGAAATTGAAAAGAAAAAAAGAGGACTCGCCCTTTGTGTGTGTGAGTGTGAAAAGGAATTTAAAATTATTCGAAAAAAAAGTTGTAATAATCTTTTTTGGAAGTGGAAGGTAATTCCGTAAAGGAAAATCTATTCAAACTGGAAATGGACGCGTAT…
TIPE_Drome	TIPE_DROME	TIPE_1	TIPE_DROME_1	TRINITY_DN936_c0_g1_i17	A0A023ENS8|Protein^A0A023ENS8|Protein^Q:2-640,H:74-284^81.3%ID^E:1.4e-102^.^.	107.068	1.25682	2.38968	0.184638	3.66566	0.000246699	0.0434264	Yes	AACAACTGCTATTCTATCAGTATTTGCCTTTTTATTCTTAATACCATTTGTTGTTGATCCAGCGATATCGACAATTGTAGCTGATTATGACCCAGTGCCGGTGACATGTATAACAACGGATCATGTATATGCAATGTCACTATCAAATTGTTCATGGGCATCTTGTCGTGAAGGGTGTACAACAACACCAGTAAGATGCCATCAAATATTAGTTAACTATTCACGAATACCATTTCACGAGTGGGAAAAAATAACACCACGAAAAGAATTAGATTCTGTGGAATGGGATGTCATGGATACAAGGTTATTAATTAATACCGAGGGATGTGGATATCCACCAAGAGTAAATTGTACAATATTCGCAAAAGAATATGGTGCCTCACGAATAGGTGACCCATT…
Unidentified	Unidentified	Unidentified_21	Unidentified_21	TRINITY_DN400_c0_g2_i1	.	37.5347	1.27017	2.4119	0.179763	3.83931	0.000123378	0.0233356	No	TTTGTATCGTATTATTTGAAATTGACTGATATTTAATTGAATTGTTGCGTGTCAATGAAAAGTGAATTTTAGCTTTTAATTGATTCTGGAAATAAAAAAAAAATAAATTCAATATTTAAATGAATGGAGCAATTAACAGAAATAAGTTAATTAAACAACGACAATGACAATCAAAAAAATTTCTTAAGATATCTAAAATTAAATTGAATTTAATAAAGAAAAAACACCTTTTCACGATGAACCACCGATAATGACTGATTCCAGTCCGATAATGCACAATTAAATTCAAAAAAAAAAAATGTAATCAATAAATTGAATGATAAGAAAATTACGAGTGAGTTAAAGACGAATCAAGATAAAATTATATAAGAATAGAAGCACGTAATCGTTAAATATGTA…
PPAF3_HOLDI	PPAF3_HOLDI	PPAF3_1	PPAF3_HOLDI_1	TRINITY_DN1151_c0_g1_i18	A0A026W9Q2|Peptidase^A0A026W9Q2|Peptidase^Q:1021-368,H:12-233^41.3%ID^E:6.5e-42^.^.	123.735	1.2999	2.46213	0.114879	6.26665	3.69e-10	1.73e-07	Yes	ATATTTTGATTGAAACACTCATTTTCAGTACAATTTTAATTTTATTTATCCATAAAACACAAGCAGACATTAACATTTCATGTAAATAAAATTAAAAATGATTTTTTTTTGCACATGCGAACAAATGAGAGTTAGACCAGAATCGTAATTTGATATTCCTACTCCAATTTAATGAGCTTGTTATGATAATTTTGAAATTCAATACCGGTTTAACACCTCTTTTAGCATGTATGTCTTTTGTTTTAACAGTAAAATATGAATATGAGATGGAATCCCTCGGCAATTTAATCACATAATAAAAGGTTGATGATTAATTTTTGGTTTTAAAATAAAATTTATTGCCCATTAAATTGAATTATTTTACATTCCAAACTGTGTCCTCGATCCAATCCAAATACT…
Unidentified	Unidentified	Unidentified_31	Unidentified_31	TRINITY_DN765_c1_g3_i1	.	32.6268	1.38615	2.61381	0.200895	4.01282	6e-05	0.012699	No	CTGCGGTTGGTTGCCAATCAAAGTTTTCCAAGGTCCGTTTAATTCCACTAAATGTACAAAGTGTTCCTGATCGTGTGCATTTATGAACTGGCTTATCTCGCATTGAAATTTCATTACAATGAATATAATTTGTGTTGAGTAACAACAAAAATATAAGTGACGAAATCATTTTTATTAATTTGATTTTTATTTAAACTCCTTTTGCAATAATTATTCAAAAACTGACTTTATTTTTATTACTTTTCAAATTAATATACCTTAAAATATTGATAATCTTTTCAAGATTAACATGATTGATGCAAGGAAATGCCAAATCCCTGATAAAATTATATCAGTCAGTATTCATTGGGCACATCAAATTGAATTTTATTTTAATGAATTCTTTTATTTATTAACTTT…
ABCA3_HUMAN	ABCA3_HUMAN	ABCA3_2	ABCA3_HUMAN_1	TRINITY_DN75_c0_g1_i1	A0A084WM40|ABC^A0A084WM40|ABC^Q:2332-2,H:3-741^47.1%ID^E:1.4e-203^.^.	69.7018	1.41717	2.67062	0.18096	4.62629	3.72e-06	0.00101828	Yes	CGAATTTCTTTTTCAGGAAAAATGGGCTTCCCATAGTTTGTAGTTCGCCTTGACTCATGATGGCAATGCGATCCCCTAAAACGTCAGCCTCGTCCATGAAATGTGTTGAAATTAAAATTGTCCTTGATTTCTTTTCCTTCAAAAGCAATTCCCATAATTGACGTCTTGCACTTGGATCCATGCCACTTGTGGGTTCATCACATAACACGATTCGGCTTCGTCCGCAAAGGGCCACACAAACAGACAATTTTCTTTTTTGACCACCACTCAACTGTTCTGAGGGTGTGTTGATTTTAGCTCCCAATTCCAGTAAATCCACATATTTATCGATTTCCTCTTTAATTTCACCAGGTCCAAGTCCTTTGAGCTTGCAATAGAATTCAATGTGTTCTTTAACCG…
Unidentified	Unidentified	Unidentified_6	Unidentified_6	TRINITY_DN1424_c0_g1_i2	.	31.1057	1.4353	2.70438	0.199652	4.28393	1.84e-05	0.00435271	No	CTTGGACACTCAAAGAGGTGTGTCCAAACAACGTTACAAACCTGACAACCAGAGAGCCATTTTGTAGAACAGATTATATGAAAAATGAATCTATCATGGTAATCGTTCATCTTATCAACGAAATATTTTAAGGATAATGGTGCTTTAACGCTGCAATATACAAATGATAAATTTATGATCAATGCCTCAAGAGATCAATTTAAGAAAATTGTGATATCCTGGGTGAAACTTCGTAGCTGATGTTGTTTAAAGATGATTCTAGCCTTGATATGATTTGACTTGTATTTTTTAATTAAATGTAACATATGATTGTGATTAGTTGATAAGTTGACCAAGAGCATTGCCTGTTGTGTCAGTAAAATAAATTAAGCTTTTTTTAAATATTTTCATTTCATTGCA…
IPOU_DROME	IPOU_DROME	IPOU_1	IPOU_DROME	TRINITY_DN3827_c11_g1_i1	A0A067QRK5|Homeobox^A0A067QRK5|Homeobox^Q:1208-1053,H:69-118^71.2%ID^E:1.9e-12^.^.	33.0387	1.51665	2.86125	0.194474	4.8163	1.46e-06	0.000464306	Yes	CTGAGCCCAATACCTGAGCCCAATCCCTAAGCCTAATCTCAGAGCTAATAAGTTAAAGTTCATTTTAGTAAACTTCTCCATCCAATAAAACAAATTACCAATTTTCTAAAATTTTTAACCGTATTTAACGGTTTTTTAAGGCTTAGAAGGCTCTGGAGCCCAATCCATGAGCCCGATTTCAAAACTAATGAGTTATAAATAGTTCTCATGAGCTCCTCTATCCACTAAAAACCTAAAAAGAACCTGACAAACATCCTCATGCCAAGGTCGTTGATAACTCCAGATAATTTTTGTAATCTAATATTTCTAAGAAGATGCCGTAAGCTCATCAAAATGATTGGTTCGTAGTTTTCGATTCAGCCATTGTAACTCATTCAAATCATTAAAAGGAAATCCTGT…
S39A4_BOVIN	S39A4_BOVIN	S39A4_1	S39A4_BOVIN_1	TRINITY_DN3570_c2_g1_i4	A0A034VIU8|Zinc^A0A034VIU8|Zinc^Q:910-8,H:166-544^39.6%ID^E:2.6e-64^.^.	18.5186	1.53006	2.88799	0.259453	3.6618	0.000250453	0.043655	Yes	AAAACTCACCAATAAAACTGAGAATTGATGAAACGACATTTAAATGACATGCTTTTCTAATACTGACACCTGTCTTAAGTAACAATGCAAAATCTCCTAGTTCATGAGGTAGTTCATGACATAATACTGCAAGAGCTGTACTGAATCCTGTAATGGGATCCACCACAAATGCTGCTCCAATTGCAAGGCCATCGGTGATGTTGTGCAATCCATCACCAATGACAACCATCAAAGCAACGGGAGTCAATTTTTTTGATCGTTTATGTGTATGAGATCCATTCATTTCAAAGGACTCTTCCTTTACATTATGACTATGATTATGAGAATGGGTATGACCACCACCAATTAACGAGAGAAGATTTTCCAATGAATACATAAAAACAGCTGCCATCAAAGCAC…
Unidentified	Unidentified	Unidentified_7	Unidentified_7	TRINITY_DN1866_c0_g1_i25	.	138.354	1.54087	2.90969	0.259095	3.70854	0.000208456	0.0378178	No	CGCGGTTTCTTTTACAATGATAGTTGAAAAACTTTTAATAGAATCTTATTTAAAAAAAAAAAAAAAAGTTGCGGTTTATTTTTTTTTTGTCTTTTTATTTCTTCAAAGTTATTTTCTATTGACTTCATGCAATTTCATTCAAAAGGAAAAACTCAAACAAATTCTTCTTCTCATTTACGATAATTTGTTGGTTTATGTTATAAATAAAGCAAAGAAAATGAGAAGTATTGCAGGAAAACCACTGGTAATATCTTTTATCTGTCTATTTTTCATTTAAAAAAGTTTATGATAAGGAATGGGAAGAGAAAAAAAGGAAGTTATTTGTGTATTTTAAATTAAAAAAGTTGTTTCATTGATGGAGGATTCTTTGAATTATTTTAATACAGTTCTCTTAAAAGT…
CHIT1_HUMAN	CHIT1_HUMAN	CHIT1_1	CHIT1_HUMAN_1	TRINITY_DN2223_c0_g1_i2	A0A084WPY0|Chitin-binding^A0A084WPY0|Chitin-binding^Q:6705-3922,H:12-963^51.7%ID^E:1.6e-244^.^.	111.095	1.54745	2.923	0.147819	6.54483	5.96e-11	3.03e-08	Yes	TTTTTCGTTTTATCTTTTATTATTTATTTATTTATTGCTATTTTTTTGTATTAAAATTATAATTTAGTTATAAAAGTAGAATTGTATTTACAGTTATTAATTTTAAAATGTCCTTATTTTAAATGACTTTTAATTTCGTTGTAATTTCATTAAATTTAACCGTTAGTTCGTTGTTGATGATGAGTATCCTGATGTAATTGAGGGCTCCGATGGTGTTGGTTCACCTTTTTGTAGTGTAACTTTATCCAAATTAGCTATTGATATAACTAAGGGATCTTTATCATCAGGTCGTAATAAACTCAGTAAAGATGGAAGTGCTTTTTGTGTTGTTTTTTCATCAGGTGTTTCTGTTGCACTTGAAGTTGAACTTGTCGTTGAAATTGTTGTTGTAGATACTGG…
Unidentified	Unidentified	Unidentified_25	Unidentified_25	TRINITY_DN4392_c1_g1_i12	A0A067R7B1|L-type^A0A067R7B1|L-type^Q:830-1720,H:31-325^25.6%ID^E:2.1e-13^.^.	230.256	1.59552	3.02203	0.12759	7.9592	1.73e-15	1.28e-12	No	GCTTACACAGTTATCTAACAATTCATATCGAAATTGTTAAATTATTTTTAATAATTTTTAATTTACTTACAGTGGGAAATGAAAATTAAATATTTACTGTCTAGACTTTCAATTTAATCCATAAAAAATGGAATTTCAATTAACTTTTTTTCTTTTCAGGAATCAGAATTTGATTCGATTTACGTTGGGCTTTGATCTTGTGAAAGGAAGCCATACACTTACAGTTCCAAAGTTTCTGAAAATTTTTCTGGTATCAATAAATCAGCTGCTTTAGCGATAGAGAATGCTTTGAACAGGTAAGTTAAAATTTCATTGTATGTTTGTCTTTTGAATTTAATTAATCAAAAGCTTTTATATGGAGTATCTTAAAATGATTCAGTTTTCCTACGTTTTCTACTC…
DHS3_CAEEL	DHS3_CAEEL	DHS3_1	DHS3_CAEEL_1	TRINITY_DN11945_c0_g1_i29	A0A084W2C6|Hydroxysteroid^A0A084W2C6|Hydroxysteroid^Q:1520-813,H:67-304^43.7%ID^E:1.1e-51^.^.	27.8585	1.62183	3.07765	0.23911	4.35711	1.32e-05	0.00325432	Yes	ATTTTCAATTTTTTCCCTTTCCACTTCAATAAGACATAAGTAGAGGAACAATCTAAGCCGAACTGCAATGATTCTAAAAAACTCTTGATTCAACCAATCAGAATTGCAGAAAAACCAGCTCTTAATGTAAATTCACGGTATTTTGAAATTTTTACGCCTATGTATCAAAAATGATATTTTTTTTATTAAAAAAATCGGACTTTATACAATATTAAATTTGAAGATGTGGAATGGAAAGTTTATAATTTTTCAATATTGCTTCCACTGATTTGTATTTTATCTAAAATTTACTTTGGCTTCTAACTGACATTCAATTGAAAACAGCTGATCACAATTGGACCCTTGGAGACCGCTGTGGAATATGTAAAACCTTTCGAAGGACCCTATTTGAAGTTTTCA…
Unidentified	Unidentified	Unidentified_11	Unidentified_11	TRINITY_DN272_c0_g1_i1	.	25.5513	1.71273	3.27781	0.247668	4.5736	4.79e-06	0.00127218	No	AGTTTTATATTCGATTCAGATTTTATACAAGTAAAAAATTTTATGTTAAATGTTATACGATTCATATTTTAAGTGTAGAAGGCTAGTCACATTTTAATTTTTGTTCTCTCATTGTCATTCTGTTACATTTTATAAATTGATACTTATTCGAGGAAAAAATTATTTACTTAAATTAAATTAAAATTGGTTTTTATTTTATATTAGAGAAAAAATTGTAATAAAAAAAAAATGTAATCATAAATTTTATTTGAAATTTTAAACTTAGGATACGAAAAAAAATTATGTTATTATTATTTGTTAATGTTTAGAAAAAAAATGGAAAAAATAAATTGAAAATGCTTTATTAAAAAAATTTTTTGGCATTTCAAATTTTAACCCTTCGTAACGTGGTTGGTTCCT…
Reticulon-4 receptor-like 2	Unidentified	Unidentified_R4R2_1	Unidentified_R4R2_PSHY_1	TRINITY_DN4978_c0_g1_i4	.	12.9342	1.72656	3.30939	0.304544	3.76486	0.000166645	0.0305442	No	AAATGCACACGATCAGGAACACTTTGTACATTTAGTGGAATTAAACGGACCTTGGAAAACTTTGATTGGCAACCAACCGCAGATGATCCATCAGTTATCCGTGACCTTGAATTTTCAGGCTGCACGCTTCCCGTTTTGATTAAAGATATTTGTGATGCATTTCCTTTGATAAAGAAAATCGACATTAGAACTCAAGATGTGGTGAAGATACAAGAAAATGCATTTGATAATTGCAAAAATATAGAAACTCTTTGGCTCGACAACAATAGATTTGAATTTTTACCTAGAAATGCATTTTTGCATACAATAAATATGAAAAGCCTGGGTCTCTTTAACACTGGGATGAAGGAATTAGATGAGCATTTACTTGTATACATGCCAAATTTAACTGCATTGAAT…
Unidentified	Unidentified	Unidentified_27	Unidentified_27	TRINITY_DN5183_c0_g1_i7	A0A034W1S4|Uncharacterized^A0A034W1S4|Uncharacterized^Q:4319-645,H:77-1412^35.1%ID^E:6.2e-144^.^.	883.1	1.74719	3.35705	0.0857374	13.6136	3.32e-42	8.44e-39	No	ATGAGACTATTTTAAAAGTTTATCTATTAAATGCATTTTTAATGAAAATTAAATTTAAATTATGATTTTTTATTTAATTTTTTTGTTCCTTATTTTAAAGACGACACGATATTAAACTATTGTAAAGTAAATATCTCACGACATTCGAAATTTCACTATCTATTTTTTTTGCATAATTAATTCGAGATAAAGAGGAACAATTTCCATCTAGAAGCAATAATTACATGTACTTTTTGTTTTTCTTTCTTTATTGATACGTGTGTTTAAATATGAAAATCTTGATAAATTTCTATCTGTTTACTACTTATCCGAATAATAATTATAATGATGATAAAAATGAGGTTGAAATGAAACTATTTTTTTCTGTATGTCGCATATTCGTTGTTGATGTTATTCTGT…
FAT_DROME	FAT_DROME	FAT_1	FAT_DROME_1	TRINITY_DN11417_c0_g1_i1	A0A084VP35|Cadherin-related^A0A084VP35|Cadherin-related^Q:12353-5196,H:904-3351^47.5%ID^E:0^.^.`A0A084VP35|Cadherin-related^A0A084VP35|Cadherin-related^Q:5197-245,H:3351-5159^43.4%ID^E:0^.^.	29.7659	1.78458	3.44517	0.213368	5.64553	1.65e-08	6.51e-06	Yes	ACTTACTATACAGTCTCTTGATTTTCTATATTTGTTAAAATTAAAATTAATCCTAATTTTTTTAGTATATACATTAAAGTTTTTATAGTTTATATTTTAAACCCACTGGTGATGTACAACCTACTTTCAATAAAATTATAAAAATGGCTAGTAAATGCTTCAATATAAATTGTTTTCAGCTATCTTGATACAAGATGAGTTATATACCATGATATGGTTAACATTTTAATAGATTAAATTACTAAACGTATTCTTCAGATGGTTTTTGTACATTTTTGGGTAAAATCAAAGAATTATTTACTTCAGTATTAGAGTCTGGAAGCTCAGCAATGTCTTTAAAAACTCCGACTAAATTTTCAAAGTTTGGGCCCCAATTCAATAAGTAATCCCAATGTGCCG…
CP4CU_BLAGE	CP4CU_BLAGE	CP4CU_1	CP4CU_BLAGE_1	TRINITY_DN6747_c0_g1_i3	A0A084WP84|Cytochrome^A0A084WP84|Cytochrome^Q:4675-6021,H:57-509^36%ID^E:2.5e-81^.^.	15.0778	1.92956	3.8094	0.317007	4.25721	2.07e-05	0.00484238	Yes	TTAATTTTTTTTTTTTTGTTTCAGTAGGACATGAGTGGAGGAGCAATTTGAGCCGAACTGCAGTGATTTTGGAAAATTTTTGATTCAACTAGTCAGAATTGCAGAAAAACCAGCTCTTAAAACTCATAACATACATAAATTTTGCCAAGAAAATGGTTAAAAATTACTAATTCAAATCAAAAATTCATTAAAATACAAATATATATGTATATATTTGTAAATTTATGTAATACAAACAAAAATTCACATTTGATTTAAATTTGAAGGCTCACATACGAGTAAATATTTAACTTGAACTGCTTCAAGGGAAAAATATGAATGAAAATAATCATAATAAGTAAATAAATTCATTGATGAACAATTGTAAAAAAAACTCATAAAAATATCAAACAGTTAATT…
SCX_CHICK	SCX_CHICK	SCX_1	SCX_CHICK_1	TRINITY_DN21797_c0_g1_i12	A0A067RVH9|BHLH^A0A067RVH9|BHLH^Q:1159-1524,H:37-144^52.5%ID^E:5.7e-20^.^.	9.46221	1.97134	3.92132	0.338578	4.10935	3.97e-05	0.00869261	Yes	CGTGGTTTTTAAAAAGTTCCGAGCTTTTCAAAATTATCGAGGTTTTTAAAAAGATCCGAGTTTTTCAAAATTATCGAGGTTTTTTAAAAAAATCATCAAGTTTTCTGAAGCGAATCGAGTTTTTCAAAAAGAGTACATTTTCCGTTATTTTTCGATTTTTTTTTAATTTTAAACAGAATTCTGTTCCTACAAATGTGCTCGTGTTGTCGTTCATGATCATATTCAACTGTTTTTTTTTTCATATAAGTGTGAGAATTTAAAATTGAATTGAATCTTATAAGAAACCAAAACAGGGGAGTTAAACGTTAATGGTTGCGTATTTTGTGTGAAGATGTTTTATTTTAAAAGACATCTGTTTTTTTAATTAACGCGTTGCATTCATAAAATTGTACGACACCT…
Unidentified	Unidentified	Unidentified_17	Unidentified_17	TRINITY_DN3239_c0_g1_i3	.	19.0027	1.99949	3.99858	0.264174	5.3733	7.73e-08	2.92e-05	No	GTGCTAAGAAAAAATTTTCATTGGTGCTAAGAAAAAATTTCCATTGGTGCTAACTTCACGCTCATCTTCTGCTAATAATTATCATTAAAAATTCTTCATATGTTTAAAATCATTGATTTGCAAATATCATTGAACATAAATATTAAGTCATATGAACACTTATAAGACAAAACATTAAATTAAACATCAAAACTATAATCTTCGATTAAAACAAAAATTAAATTAATTAGTAGTAATTGAACATTCGCCGCTTTATTGCATGCAATGATGAATGATTACATAAATAAATGGTCGAACTTGAACTCGAAAAGTTATTTATTCATTAATATTTGTATTTTATAAATAAAAATAAATTATGTCTGTGTATATAAGTGAAAACAGTTATACATGAAATGAAAC…
Predicted: piggyBac transposable element-derived protein 4-like	Unidentified	Unidentified_PBTE_1	Unidentified_PBTE_VOEM_1	TRINITY_DN4366_c0_g4_i1	A0A023F5Y4|DDE_Tnp_1_7^A0A023F5Y4|DDE_Tnp_1_7^Q:1843-215,H:26-575^42%ID^E:4.1e-119^.^.	14.5316	2.1074	4.30914	0.26752	5.70948	1.13e-08	4.58e-06	No	AAAAAAAAACGTTATTTTTTGGAAATAAGAGTACGTATTTTTATTTTCATCACATTAGAATAATAAATTGAGTCATTAATTCAAATAAATATCTGTTTCTGAATTTTTAAAGATGTTCCTCGAAACCTCCATAGAAATTTTTATTATATAACTTTTACTTTAGCTTCATCATCAAGCCAAAATTAGCGGAAAAATTGATAAGTTATATTTTATTTAATTGACAATTCATACAAATAGAAGCTCTATGAGCTAAACAAATTGGGGTTTTGCAAGCTGAACAAGCAAAATTTGTTTTTCGATCCTCTTTGTAGGAACAAAGACCACATCTTTTACGTTTTTCCAACTCTATTATAGGAATGACGGGGTCAGATTCAATTTGGAGGATTTCTTTAATTATCG…
LIPR1_CANLF	LIPR1_CANLF	LIPR1_1	LIPR1_CANLF_1	TRINITY_DN20414_c0_g1_i2	A0A084VIF1|Lipase^A0A084VIF1|Lipase^Q:1836-2732,H:76-374^45%ID^E:1.3e-68^.^.	9.48816	2.1314	4.38142	0.371708	4.17371	3e-05	0.00674438	Yes	GAAAACTATCTTAAAAAAAAATAATTTTGACACGATCTTAATTGTCTTTTAATAGTTTCATACATAAATATAGCAATTTTTCCTTATCTTATCATTTCACTTCACATCACTTTTCAGATTCGCACTTTTGGAAAGGTATAAATAATTGAAAATTGCTAATATTTGTATTCAATTTACACCAGAAAAGTTAAAACACGGTTCATTCCATTTAACGGTCATAAAACATGAAATTAATTTTATTTTCGTTATTTTTTTGTACAATCCTGGTCTGTGTGATTTCAATTCCGATTCAAAAAGATTCCAAGATACGAATTGAAGCAATCAACAATTACTTGTATGGTGAACCAAATCCAGAATGGCTTAAATATGTAAATCACGACGGTTATTTCGATGCATCAC…
Unidentified	Unidentified	Unidentified_32	Unidentified_32	TRINITY_DN7897_c1_g1_i1	.	28.159	2.14891	4.43494	0.230201	6.81542	9.4e-12	5.06e-09	No	TTCTATCTAATTCAGTCATTTTTATTGTTTATCATTCCATCATTATTGTTATCTGCCAATTTTTTTTTAATTCACGACACGCATACATTAAATATGAGTCATAGTGCATCAAATATACAATTTATTACAATTTCAAAGGTATGATTGTATCACTTTGACTAACAAATCCGCACGTTTCTATCTTCACATTTTGCATATTTATCAAAAAATAAAAACAAAAAATGAACAGTTGGTTGTTAAACAAAATTTAAATAAATGTTTAAAAGATTTGCAAAAATGTAAATAAACTGTTGAATGTGTCTGTGTATGTGTAAAATTGAAATGAAAAGAAAGAAATTGCTAACCGTAAAATGATATGAATCACTGTCATGCTGTTTTATTTATTAACACGATTAAAAT…
CP131_DROME	CP131_DROME	CP131_1	CP131_DROME_1	TRINITY_DN7608_c0_g1_i11	A0A034VE76|Serine-rich^A0A034VE76|Serine-rich^Q:2347-251,H:607-1299^46.8%ID^E:1.1e-145^.^.	17.3594	2.16108	4.47249	0.379938	4.16141	3.16e-05	0.00702912	Yes	TTTATTTTCTTCCCTCTCATTTTATTTTATTTTTTGTTATGACTTTACGTAGAAAACGAATTTTATTATTCTGGGAATAGTTTTTGATTTCAATTCACTTTATAAGCTTATTATTTATGAAATAAATATAAAAATTGTCCTGTATTTGTATATATAAAAAAAATGAAATCCTAAACCCGATTACTATTTTTTCATAGTAAAGATAGACAAAGAGAATTTAGATGTCCCATATGTCACTCAAATAATATCATTTTTTCACATAATCTTTTCTTTGTTGCTTCACAATGGCATCTAATTTCAAACATCGTTCTTTTAACCTTGTATTGTCTTTCTGTAAAGCCTCAAGCGTTGCATCTTTTTTCTCAATTGCCTTTTGAACTCTTGAATATATCCGTTGAA…
Unidentified	Unidentified	Unidentified_12	Unidentified_12	TRINITY_DN276_c2_g1_i17	.	12.6231	2.17816	4.52576	0.305984	5.22301	1.76e-07	6.39e-05	No	TTTTGATGTTGCGCGTCTTTCACTCTACTCTGGCAGTTAACAAATGATGAGAAAATCTAGTAAATGTTTTATTTTTTTTTTTGTTTTGGGAGAATCTCTGTGTGTGTTGTATGATGTCAACGTTTATTTTTGTTTGCATTACACACAGACACACAAGAGATTTTCGATTTCTGCGCATGCTACATGATTTCATTCAAACATTACATTTAAACTTTGTTTGTATCCAGTGATAATAATAATGGTACTCAATAATACTCATAATAATAAAATGAAATATAAAAAGACACATAATTATTGATTCACATATAGAGGTATCTTTTTTTTTATCATCATATACACTGAACATTTATTAACTAATTGCATACAATACAAAAAATAAATAAATTGTATCAGTTTTTG…
SCPDL_HUMAN	SCPDL_HUMAN	SCPDL_1	SCPDL_HUMAN_1	TRINITY_DN27666_c0_g1_i8	A0A023ET52|Saccharopine^A0A023ET52|Saccharopine^Q:1641-388,H:1-425^43.7%ID^E:7.4e-101^.^.	28.0995	2.21408	4.63985	0.264929	6.16798	6.92e-10	3.07e-07	Yes	TCATTACACCCATCTAATTTTATTAATTTTTATGGCTTTTTAGTACTATTAAAACGATTTTCGTTTCTTCGAGGGCTCACTTTCTTAATTTCTGCAGCCTTTCTAAAAATCTTCTAACTTGTGATTATTGAAAAATGTTAATAACTTAATAATCTGATTGTTTACTTTCACTATAGAATACGAAACAAAAAAAATTTCTTTTGTAAATTTTTTTTTTTTTTTGCTTTTTGTTTCCTCTGTGAATTTGAAACAAAAGTGACAGCTCATAATAAGAGAGTGAGTGCATGCATTGAATTGAGAGCAGAGCGAAAAAAAAGTAAACAAGAGAGAAACTTATTTTATTTAAATTTTTTGAATTGTGAAGCATGGTCATGACCGTTACAAAATTTTCACAACTTC…
Unidentified	Unidentified	Unidentified_22	Unidentified_22	TRINITY_DN40707_c0_g2_i1	.	10.7882	2.3112	4.96297	0.392908	4.40613	1.05e-05	0.00263515	No	CACGTATTTTGTTTTGGCTCTCCTGTAAACCTCCTATATGAAACCCAAAACCCTCATCGAAATGAAAAGCGTTCACCTTTACCTAAAGAATAAAGCACAGAAGAACCTCCCGTTCACAACTCAACATTTTAGGAGCGGCGGTTAATGAGATAATTCATTTGGAAACAGGAGCATTATAAATGTTTTACGTATATTTTGAATTATTTGATTGTGCGTTTCAATTGAGAAAACGCTGTAATTGTTTAAAAAAAAAAATATAGTTTTATTTTTAACATTAATTGAGTTATAACTGAAGAAATTAATTGCCATCGATGAAACTTTTTAAATTTTACAATTAAGTCCAAAAAGATTTGATCACAAATTGTGTTGTAATTCCCTAATTTATAATATTTTCTAAAG…
Unidentified	Unidentified	Unidentified_33	Unidentified_33	TRINITY_DN9008_c0_g2_i1	.	298.394	2.31927	4.99079	0.10129	17.1712	4.36e-66	1.94e-62	No	TTCAAAGCCGTATTATTAAAGAGGTAAGCCTTTTTTTTTTAATTTTCATCTTCAAATTTTAGTTTCACATCTCTGTCTGTACCTAAATAAAATACGTATATTTTTCACACGTACGCCTTGTATGATACACTTAAACGATACAAATTCATAAACATATTTTGCACAATAACTATATGCGCGACAACGATAACAGAGTATATAGCAAAAAGGATTCAGAACATTATTCATACATTGAGCTGATCAGAAATAAAACTGATTTTGGCCCGAAAACATTGCATCAAAAAAAAATTTTTTTTTTCTTTTGTATAACTTACAAATTTTTAATAAGAAGAAAAACTTAAAAGACCTAAAGTGCACTAAAATATAAGCACACTAAAAATTAAATTGTGTAAAGAAATT…
ELVL1_AEDAE	ELVL1_AEDAE	ELVL1_1	ELVL1_AEDAE_1	TRINITY_DN33350_c0_g2_i1	A0A067QTA4|Elongation^A0A067QTA4|Elongation^Q:421-1143,H:2-241^61.8%ID^E:3.6e-79^.^.	9.52923	2.40763	5.306	0.366629	4.98494	6.2e-07	0.000220393	Yes	TTCTTTTTATTCTTCTTCTTTTTCTTGTCTTCACCTTTGCTTTCATTGTCATTTGCTTCATCGACCCCCGTAATGGGTACCTTTTAATTGAGAACCACAGATTTCAATGAAGAAAAAAAATACTTGTAATGCAATTTCACTTTTAATTCATAAATAAATTATTAAAAAAAAGGAATTTAAATGTTTCATAGAATGAAGTGAATGAATCAAATTTCTATTATTATGATCACTTTCAATGCAACAAGATTGCAATGAAATGAAATACATTAGAAATTAGCTTTTGTTATACATTTTTAATTTAATTTAACACATTTATTTAATATTTTCCAGGTCAATTATTTATGAATTTGAGTTGACTTGATTGAAATGGCATCTCAAGTTAAGATTCCTGGGGAATTT…
PXL1_CAEEL	PXL1_CAEEL	PXL1_1	PXL1_CAEEL_1	TRINITY_DN4135_c0_g1_i10	A0A023EHU3|LIM^A0A023EHU3|LIM^Q:2554-2904,H:76-176^43.7%ID^E:7.4e-24^.^.	7.46283	2.42969	5.38777	0.427754	4.32418	1.53e-05	0.00372868	Yes	TTGGTGATTTGCTTGAATATTTTCCACATTATTATAGGGTCGTGGAACCGTCTACCGTTCGTAACCCACTACCGTGTATGTTAAATAATTTTGACTTAAATAAACAAGTTTTTTCATAATCTACCGATTAAAAGAAGTTCTCAAACAGAATTTACCTTTATTTTTAATGTACAGAAGTTTTCGATTCACATAGACAATAAAATGAACGATAGGTATTCTTAAGGTAATCATAGCCAGTAACTCGACCCTACATATTATTTAACAACATAGACAAGGCTAAATGAAAGTCGAATACTCGATAGTTCAAACAATTCCCCAAACTTTAGAACTATAAGAACATTTTTAAAACTGTTCTTTAAAATGGTCTAAAAGTTATTTTTTCTTAAGTATTAAAATGTT…
ABCA3_RAT	ABCA3_RAT	ABCA3_1	ABCA3_RAT_1	TRINITY_DN47503_c0_g1_i1	A0A084WM40|ABC^A0A084WM40|ABC^Q:512-3,H:1362-1531^63.5%ID^E:3.4e-64^.^.	5.04809	2.43697	5.41502	0.473774	3.91952	8.87e-05	0.0175271	Yes	ATAATTGTTTTACCCTCCTGGCGAATCGTTGAAATTATTTCCCAAAATTGACGTTTTGCACCGGGATCCATGCCAGTGGTTGGTTCATCAAGATAAATGACACTCGGATCTCCAAGGAGGGCGACCGCTGTACTTAATTTTCGTTTATTTCCACCGCTATATTCCTTGACTTTTTTTTCAAGGTGTGGCAGGAAATTGAGTTCTCTTGCCATTTTCTTCGTTATTCTAGGAATATCTTGCTCTGGAAAACCTCTTAATAGGCAGTACATTCTTAGAGTTTCTGTTCCAGTCAAGTCCTCTAAAACGGCATCAAATTGTGGACAGTAACCAATCCTTTTATAGACCTCATTCAATTCCTTTTTCACGCTCAGTCCATCGACGAAAGCATCGCCCGACGAA…
GGT1_HUMAN	GGT1_HUMAN	GGT1_1	GGT1_HUMAN_1	TRINITY_DN3598_c0_g2_i1	A0A034WWC7|Gamma-glutamyltranspeptidase^A0A034WWC7|Gamma-glutamyltranspeptidase^Q:1848-343,H:46-569^27.1%ID^E:3.8e-34^.^.	4.97465	2.46728	5.53	0.480306	3.92933	8.52e-05	0.0170167	Yes	GACAATCTTTATTTACGTACAGAATTTTTGAAGCTTCCGTATGTGTATCTATGCAAAATGAACTGTCATCTTTTATCTGCATACCCAGTTACAGTGATTTGGTCAGTTTTTTCATAGATTGTCTCAAGTAAGGATATACAATAAGTAGCACAATCGGATCATAGAATTATTGCCTTACCTGAAAACGGAAACAAATTACACAAAAAGTGTTTCCGGAAATTGATATGCCGATTAAGAAGATGCTTGATATTAATAAAAAGGGTTGAAAAATCCAAATTAGATTTAATTTTTATTTTTATACATATATATTTAATAATCCGAGTTTTTATTTATGTAAACTTCGCCACCCCTTCTTGGATCGAATGAGGCTTCAGGTGTATTTTTCACTGTACTACTAGC…
Gamma-glutamyltranspeptidase	Unidentified	GGTP_1	GGTP_1	TRINITY_DN9435_c0_g1_i3	A0A068W866|Gamma-glutamyltranspeptidase^A0A068W866|Gamma-glutamyltranspeptidase^Q:127-693,H:66-272^28.9%ID^E:6.6e-10^.^.	7.18459	2.58723	6.00942	0.480531	4.1771	2.95e-05	0.00672975	No	CATTTCACATTGAGTTGTCTTATTAAAACATAATCAAAAATGATACATTTATTATTATTATTTTGTCTTCTATTTCCATATTCAATTTATGGCTCATCTGATATTGTGGTGACAAATAATGAAATTTGCACAAATATGGCGAAAAAATACATTGAAAGTCATAACGTGACAGTGCCAGAACTCGCCATTATCACGACAGTTTGTGAAGCAATCGTCAATCCATTGGAACCTGGACTTGCAGGTGGGTTCCATGCAACAATTTACAATGGGCATTGTAAGAAAAGTCTCTACTTGGATGCGTCAGTTGTGGCTCCAGATGCATATTCGCCCGGATCACGTAAAGCAAATCCTGATATTGGAATTCCATTGATGTTGAAAGGACTTCAATTTTTGTATAAA…
GTA_NPVOP	GTA_NPVOP	GTA_1	GTA_NPVOP_1	TRINITY_DN30495_c0_g1_i3	A0A026WC52|Transcription^A0A026WC52|Transcription^Q:353-832,H:732-908^31.6%ID^E:1.8e-20^.^.`A0A026WC52|Transcription^A0A026WC52|Transcription^Q:28-1140,H:633-974^24%ID^E:1e-12^.^.	6.45093	2.68416	6.42705	0.447569	4.70131	2.59e-06	0.000765986	Yes	GAAGAGCTCAAGACTGTTTCCGGAATGAAAATCATTGAAACATTCGAATACGAGTTAGAACCTAAGGAATTTGAATGTTACAAAAGATTAATGCTCTTGTCTCAATCAATGATGAAAGTATTTTTAAATCATCGTGCTCACAAAAATGGAGGTGCAGATCTTTTCCAAGGCAAAGAGTTGTATAACGTTCAGAAAATTTTGAGAAATCGTCTTAATGGATACATAACAGCTAGTCATATTTTTGTATTGTTGCTTCGTTTGCGTCAATTATGTTCTCATCCTGCCCTTATTTCTACGGTAAAAAAAAAAATAAATTTTAATAACATATCTTAAAATGTCATTTAAATTACAGATGCTTACAAAATTAAATGCTGAAGAAAATACAGAACACGATGAAGA…
CLUMA_CG019782 isoform A	Unidentified	Unidentified_CLUMA_2	Unidentified_CLUMA_2	TRINITY_DN685_c1_g1_i20	.	9.92498	2.80243	6.97614	0.562243	3.95279	7.72e-05	0.015606	No	GCGGGGGCAGGTATTGCCAAGCCCTTCGAGGTGATTTGCGGGGCGTTTTTAACTTAGATTGTAACAAATTGATTAGTCAGTGAATGGACATGCACTTTTCTAAACCAATAACATAGAAATTTTTTTATAGAGTTTTTTTCCGCAAATACAAAAATGACCATTTTTATCAAGAACGACCTTTATTCTGCAATTAAACAATATTTAATCACTTACAATGTATTCTTCTTAGTACTTTGAGTCAATACATTTTTTTTCACTTGTACTTTTATTTTTGTGATAAGAAACCGCGTGCAGTACATACAAACAATTATTCTTGATACTACAAAAAGATTAATACACTTTATCAATGACACACTACAAAAAAAAATGAGTTCAAGGTCCCATGATGTACATAATTTT…
Unidentified	Unidentified	Unidentified_30	Unidentified_30	TRINITY_DN7344_c0_g1_i1	.	4.91637	2.81749	7.04934	0.477414	4.68669	2.78e-06	0.000796226	No	GTGAAAATCTTTTTTATTTTAACCCCTTGACGTGCCACGTGTGCCATCAAAAAAATTTCCTTAAAAAAGATAATCAATGAAAATTGAATGTAAATACTTTATTTCTCAGATTTTGATAAAACAATAAAAGCCTGTAAACGATTCCAAGAAAAAAATTTCTAAAATATATCTTTCAAGGATATTGTGACTGATATTTCGTGATAAGTGTGTGACTTACCTTCAAAAAGAGACAGAAAATGATTTTTTTTTTAATTTAATTTATAGATTAATGTCAATTTCCACTGACACAATTTATTAGGGGGTTGAGTACCTCTCCCCTTGACTGCCTCATTAATCCGTCCCTTTTAACAACGTAACACGTTTCTGTAAAGAAATCTTTTTTTTCTTTTCATTCAAGCC…
Unidentified	Unidentified	Unidentified_20	Unidentified_20	TRINITY_DN3598_c0_g1_i4	A0A026X1J2|Gamma-glutamyltranspeptidase^A0A026X1J2|Gamma-glutamyltranspeptidase^Q:1313-15,H:144-603^26.3%ID^E:5.1e-26^.^.	5.90596	3.21181	9.26512	0.543878	4.83897	1.31e-06	0.000421893	No	TAACTTGGAATGCATCGTCCGGCCTTATTTGCATCAACTAATGTCATATTATTGACAAAATAATTGAAAAATGTGTTAAAAATCGATCCAATGATTTTACTTCCACCAGCTGATCCAATTTGAAAAACAGGATTATGTTTCTTTGAATACATGACAACAGTTGAGATGGCTGATTGTGGTTGTTTGTTACCCTTTGGTTCATTTGGTGTTCCCGGCAAATCAAAATCTCTCAATTGATTATTGTAAAAAAGTCCTAGACGATTGCTGAACAAACATGAGCCCCATGACCAATTTATTGTACTTGTCATTGAAATTGCATATTTTCCACGTTTGATAATTATATTTGTTGTTCCCGTTTGACGTCGATGTCGTGGGGTATCGATTGACATTTTATAGTTG…
Unidentified	Unidentified	Unidentified_13	Unidentified_13	TRINITY_DN2803_c1_g1_i20	.	15.7198	3.2753	9.68195	0.593805	4.53903	5.65e-06	0.00146059	No	ATTTAAAGTAGTTTTATGGTATTTAATTTTTTTTTCAAACCCTGAGAAAGAATTTTTCCTCAATGAGACATCAATCTGCACTGGAATGAGGCTTTTATCGAGAGCTACCCTCAAAGAAGTTTCATTGCAACACAATATATTTGCCTTGAAAGGTGACATTGAAATAACAGATAATTTGAGTAATGATGTGATGCTGAATATCAGATATAAGCGCTGTAAAATGAATATGAATGAGTGTTATGGTGCTTTGGACTACCCTTTTCCCAATGCTTGTATTCTGTTATCGGCCAAAACTCCATTTGGAAATGGATTGGGATCAGCATTTACTCCGAAAATGACATGTCCAGTGAAAAAGGGAACCTTTCACTTCAATGTCAAACTTAATTTGAATTCAATTGC…
Unidentified	Unidentified	Unidentified_1	Unidentified_1	TRINITY_DN11497_c0_g1_i3	.	5.24677	5.0902	34.0645	0.960948	4.69348	2.69e-06	0.000782833	No	CTGAAATGACGAGGAAGTAAAAATTGATGGAAAAAAATATTATTAATAATTTTTTTCGCGAAATTTTCATGTTCAACTGATTTACAGTGGAAATTTAACACAACTAAAATTAAAATGCAAAATTTTTTGTTTGTTTCATTTTATTTTTTGTCAAATAATCACGTCAATCAATTTTATTTTTTATCATCATAATCATAGTTATAATTGGACAATTCACATTAATCTTTCATAACGATAATATTTTCAAAGCACATGAGAGGTCGTTTCCGATTATTTGGTAGATTTTCTGAAATTACCATTCGATCCCATGTTCGAAACTTGGCAAGTGGAAGTCTCGCTAGTGGTTTGATGTTGATGGTCAAGTTCAGTTTGTAATTTCCTGGTTTTCCTGGACAAGCA…
