# Supplementary material for: Vesicular Stomatitis Virus Elicits Early Transcriptome Response in Culicoides sonorensis Cells
Source: Viruses. 2023 Oct 18;15(10):2108. doi: 10.3390/v15102108 (PMC10612082; doi:10.3390/v15102108)
Supplement: Supplementary file 1 [file viruses-15-02108-s001.zip › Supplemental Table S2.xlsx]

## Sheet: Supplemental Table 2
	N	N	N	N	N	N	P	P	P	P	P	P	M	M	M	M	M	M	G	G	G	G	G	G	L	L	L	L	L	L
1	629031	591726	620203	607957	584631	581348	271420	310522	280309	269270	313333	262760	97893.5	95831	96674.7	120248	96614	155100	734.416	1921.11	2812.8	2525.55	5283.83	792.513	920.701	0	0	0	137.902	0
8	227694	226122	219924	229858	232437	237120	304409	298665	304922	297441	302797	298638	363061	367525	366352	364154	356408	358078	103095	105770	107036	106745	106702	104629	1741.05	1917.99	1765.99	1801.23	1654.9	1535.13
24	216585	225997	221729	225551	232378	221224	305962	298657	320968	312935	312306	312966	379942	379810	361201	362878	361111	367915	95719	93847.7	94210.5	96958.4	92519.9	96360.4	1792.48	1688.42	1890.87	1677.44	1685.63	1534.68
96	195723	188518	194248	198178	199882	195196	309711	315085	314026	317510	303100	306215	390964	395511	385859	379617	388008	394077	101765	99363.8	104085	103140	107556	103122	1837.75	1522.61	1782.23	1554.64	1453.82	1389.76
