# Supplementary material for: Vesicular Stomatitis Virus Elicits Early Transcriptome Response in Culicoides sonorensis Cells
Source: Viruses. 2023 Oct 18;15(10):2108. doi: 10.3390/v15102108 (PMC10612082; doi:10.3390/v15102108)
Supplement: Supplementary file 1 [file viruses-15-02108-s001.zip › Supplemental Table S3.xlsx]

## Sheet: Sheet1
Comparison	Mean 1	Mean 2	P value	Significant
N
1 vs. 8	602483	228859	<0.0001	****
1 vs. 24	602483	223911	<0.0001	****
1 vs. 96	602483	195291	<0.0001	****
8 vs. 24	228859	223911	0.1478	ns
8 vs. 96	228859	195291	<0.0001	****
24 vs. 96	223911	195291	<0.0001	****
P
1 vs. 8	284602	301145	0.1227	ns
1 vs. 24	284602	310632	0.057	ns
1 vs. 96	284602	310941	0.041	*
8 vs. 24	301145	310632	0.0227	*
8 vs. 96	301145	310941	0.0216	*
24 vs. 96	310632	310941	0.9416	ns
M
1 vs. 8	110394	362596	<0.0001	****
1 vs. 24	110394	368810	<0.0001	****
1 vs. 96	110394	389006	<0.0001	****
8 vs. 24	362596	368810	0.1291	ns
8 vs. 96	362596	389006	0.0004	***
24 vs. 96	368810	389006	0.0007	***
G
1 vs. 8	2345	105663	<0.0001	****
1 vs. 24	2345	94936	<0.0001	****
1 vs. 96	2345	103172	<0.0001	****
8 vs. 24	105663	94936	0.0002	***
8 vs. 96	105663	103172	0.0559	ns
24 vs. 96	94936	103172	0.0027	**
L
1 vs. 8	176.4	1736	0.0002	***
1 vs. 24	176.4	1712	0.0001	***
1 vs. 96	176.4	1590	<0.0001	****
8 vs. 24	1736	1712	0.6626	ns
8 vs. 96	1736	1590	0.1027	ns
24 vs. 96	1712	1590	0.0234	*
1
N vs. P	602483	284602	<0.0001	****
N vs. M	602483	110394	<0.0001	****
N vs. G	602483	2345	<0.0001	****
N vs. L	602483	176.4	<0.0001	****
P vs. M	284602	110394	<0.0001	****
P vs. G	284602	2345	<0.0001	****
P vs. L	284602	176.4	<0.0001	****
M vs. G	110394	2345	<0.0001	****
M vs. L	110394	176.4	<0.0001	****
G vs. L	2345	176.4	0.024	*
8
N vs. P	228859	301145	<0.0001	****
N vs. M	228859	362596	<0.0001	****
N vs. G	228859	105663	<0.0001	****
N vs. L	228859	1736	<0.0001	****
P vs. M	301145	362596	<0.0001	****
P vs. G	301145	105663	<0.0001	****
P vs. L	301145	1736	<0.0001	****
M vs. G	362596	105663	<0.0001	****
M vs. L	362596	1736	<0.0001	****
G vs. L	105663	1736	<0.0001	****
24
N vs. P	223911	310632	<0.0001	****
N vs. M	223911	368810	<0.0001	****
N vs. G	223911	94936	<0.0001	****
N vs. L	223911	1712	<0.0001	****
P vs. M	310632	368810	<0.0001	****
P vs. G	310632	94936	<0.0001	****
P vs. L	310632	1712	<0.0001	****
M vs. G	368810	94936	<0.0001	****
M vs. L	368810	1712	<0.0001	****
G vs. L	94936	1712	<0.0001	****
96
N vs. P	195291	310941	<0.0001	****
N vs. M	195291	389006	<0.0001	****
N vs. G	195291	103172	<0.0001	****
N vs. L	195291	1590	<0.0001	****
P vs. M	310941	389006	<0.0001	****
P vs. G	310941	103172	<0.0001	****
P vs. L	310941	1590	<0.0001	****
M vs. G	389006	103172	<0.0001	****
M vs. L	389006	1590	<0.0001	****
G vs. L	103172	1590	<0.0001	****
